# Supplementary material for: Transcript expression-aware annotation improves rare variant discovery and interpretation
Source: bioRxiv or medRxiv preprint supplement (doi:10.1101/554444), 2020-03-02

# Adipose Subcutaneous

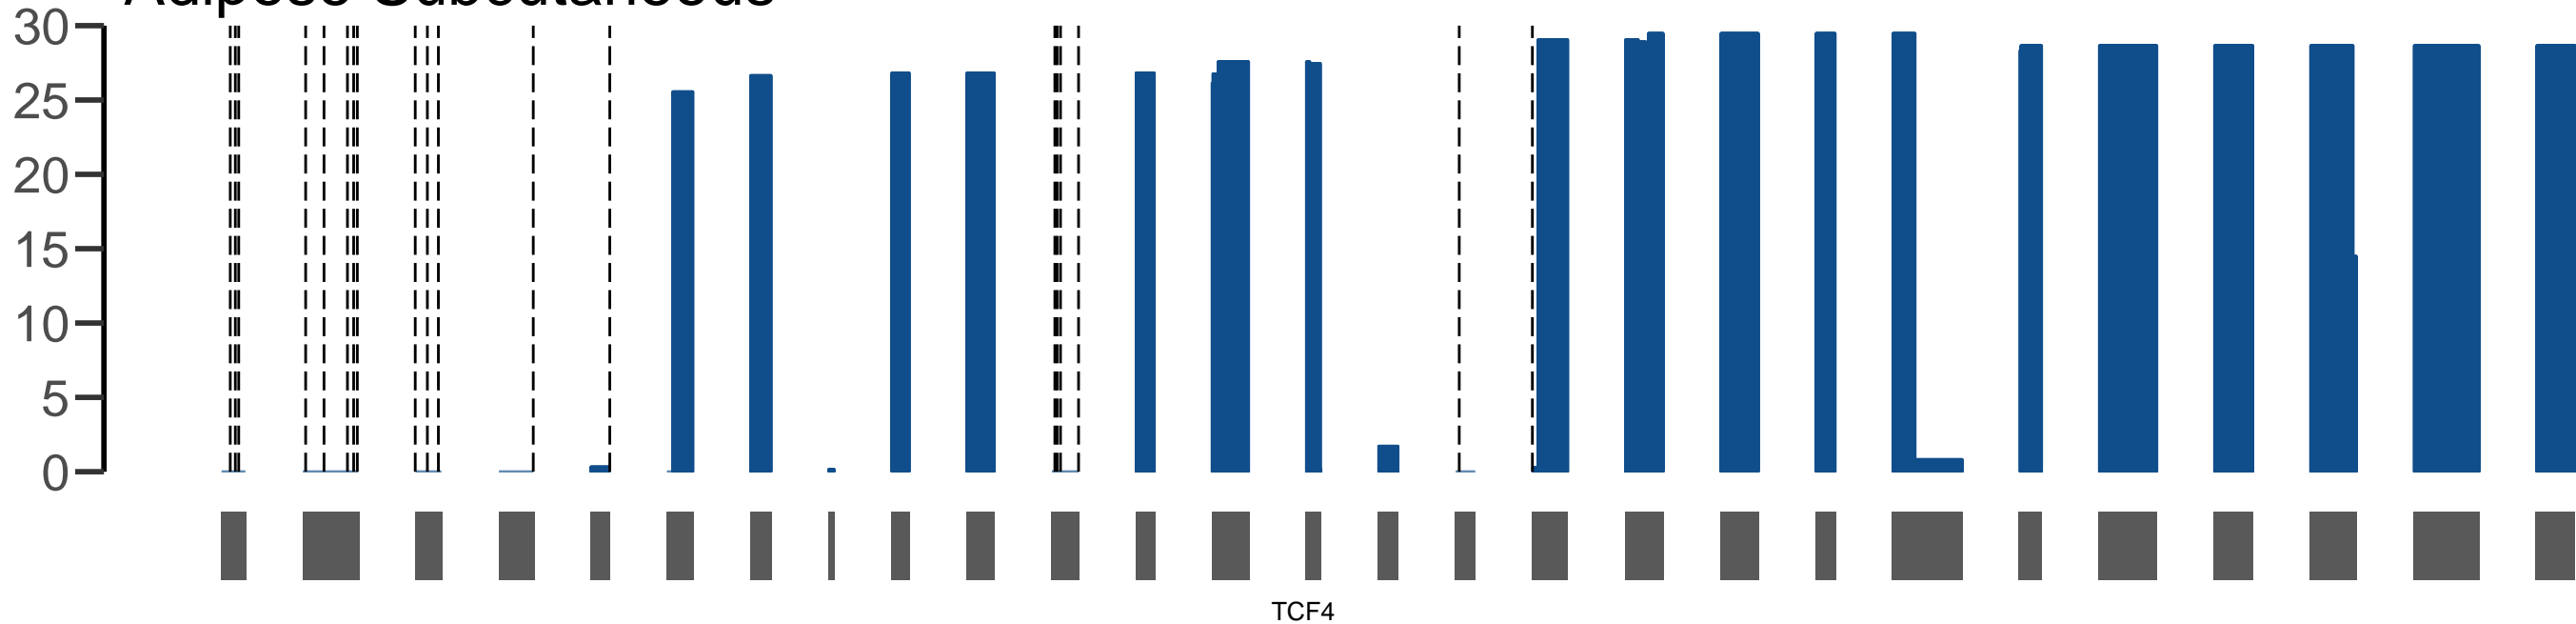

# Adipose Visceral Omentum

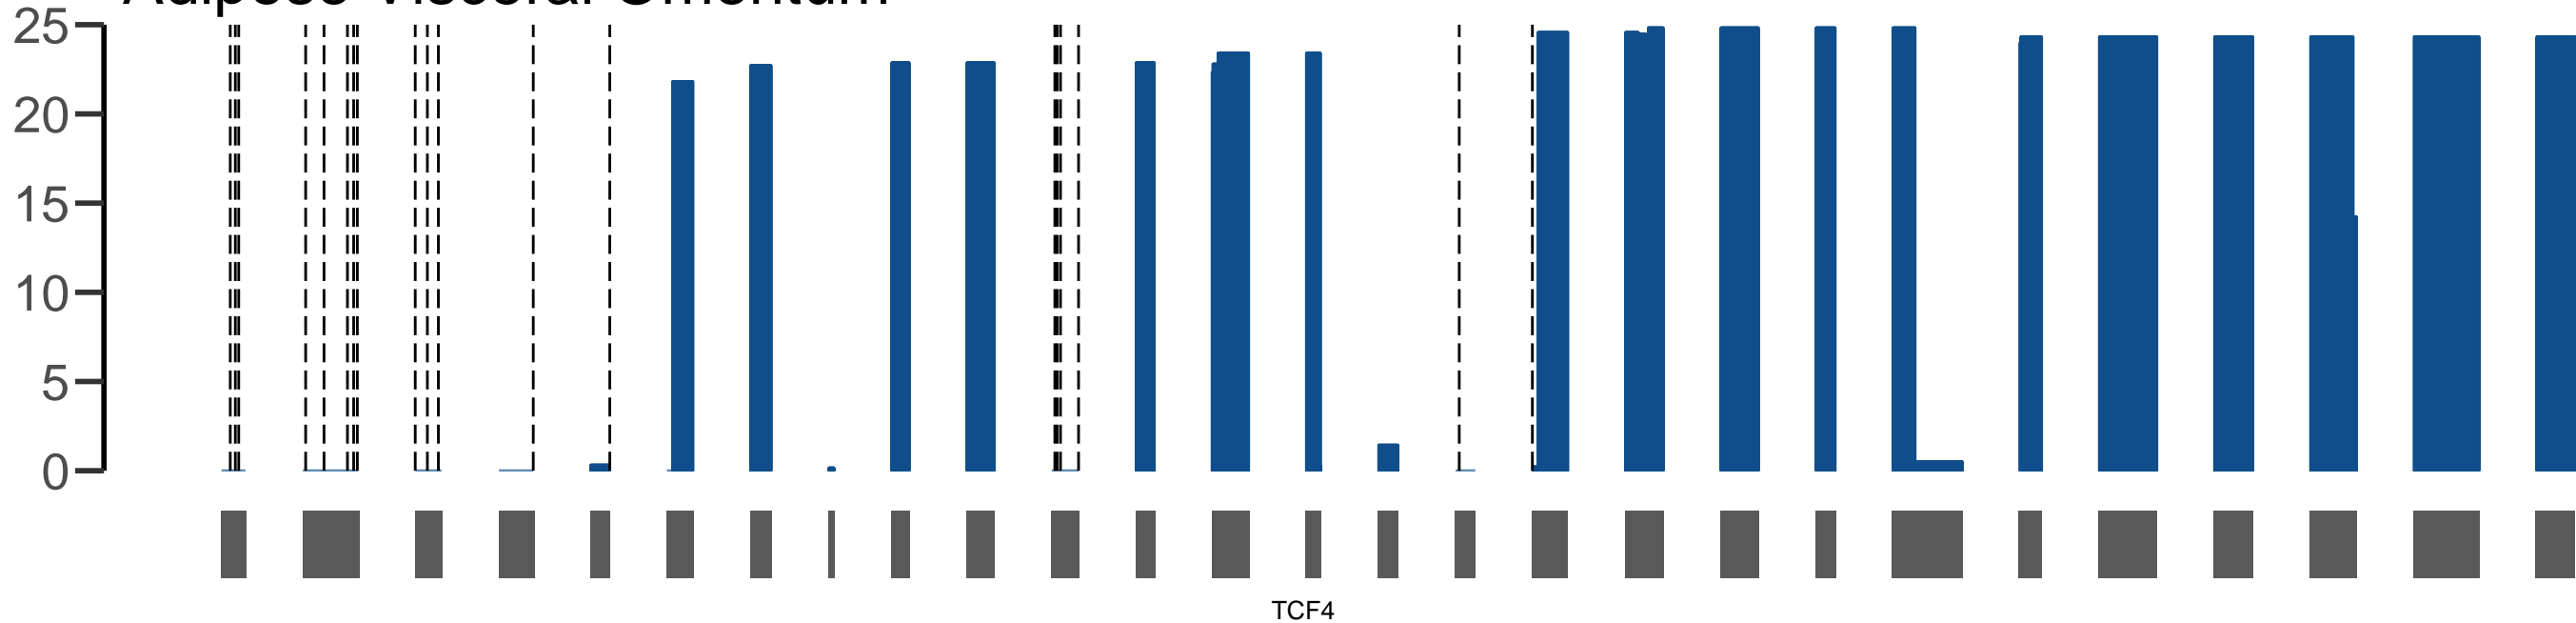

# Adrenal Gland

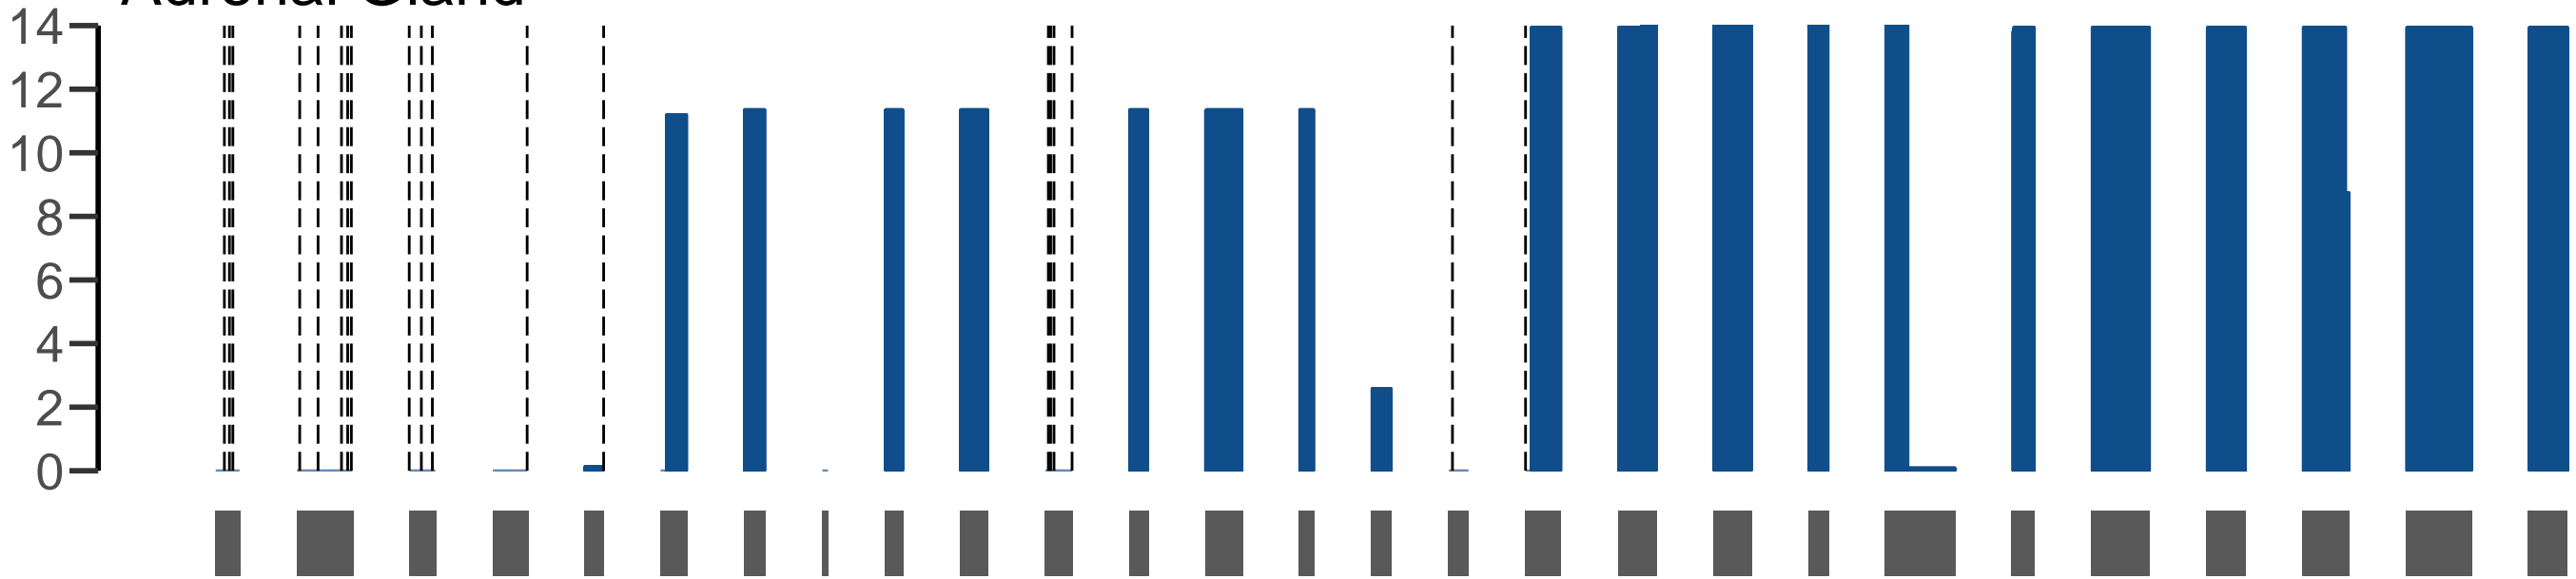

TCF4

# Artery Aorta

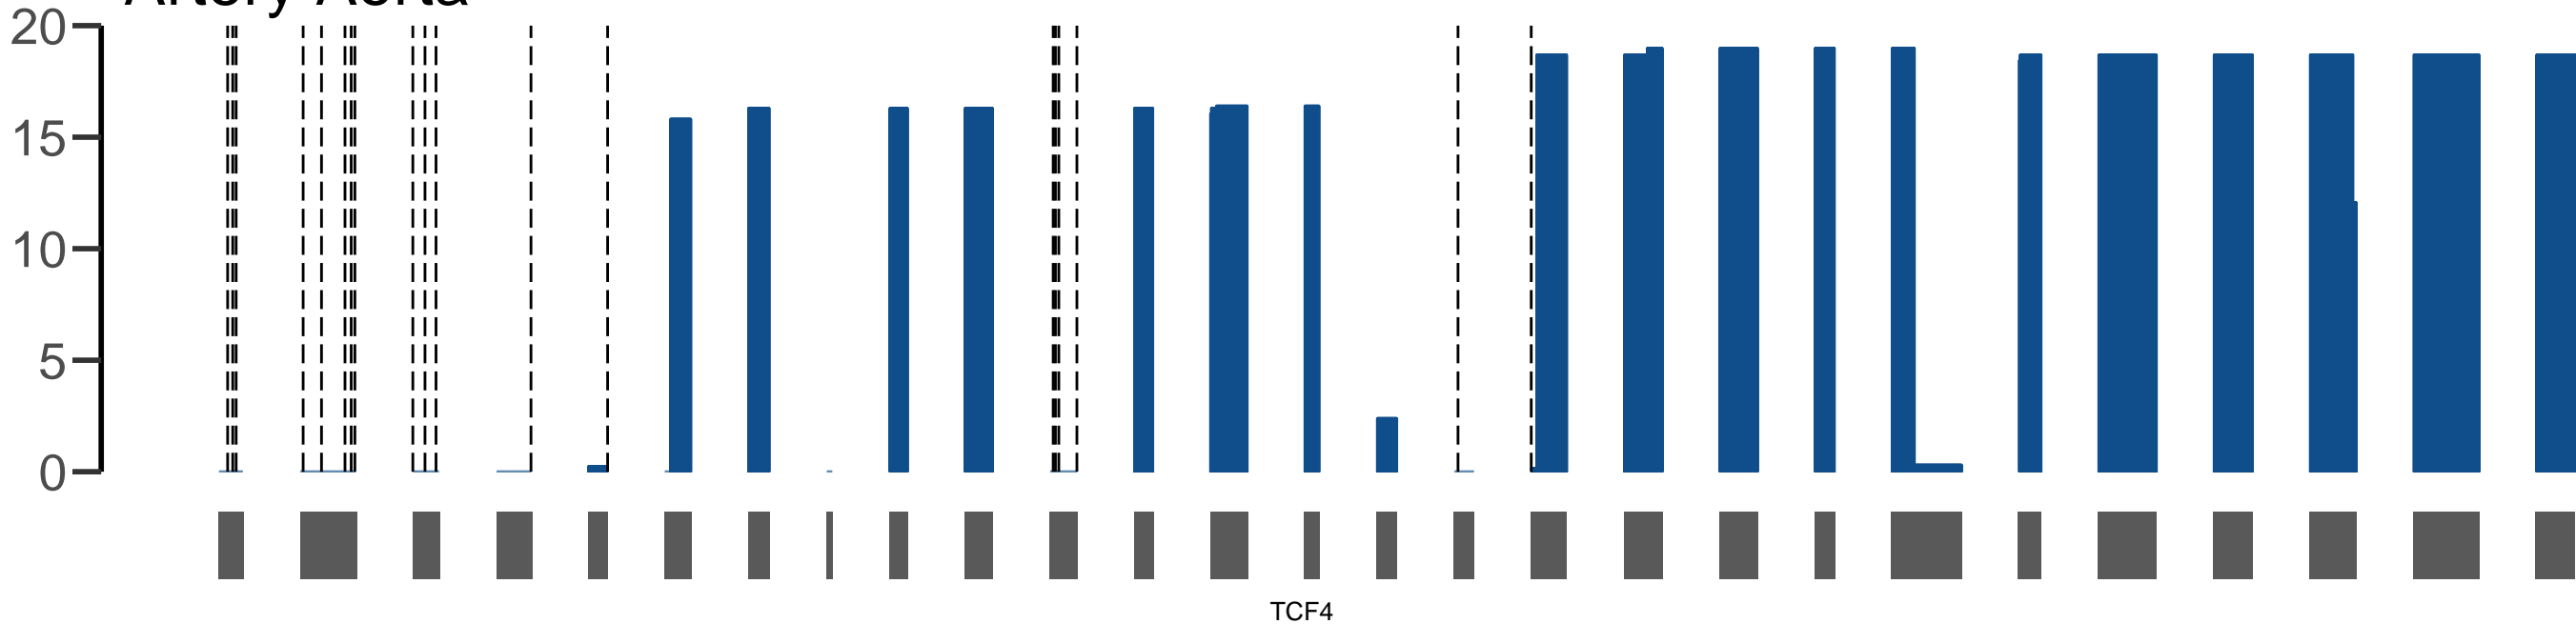

# Artery Coronary

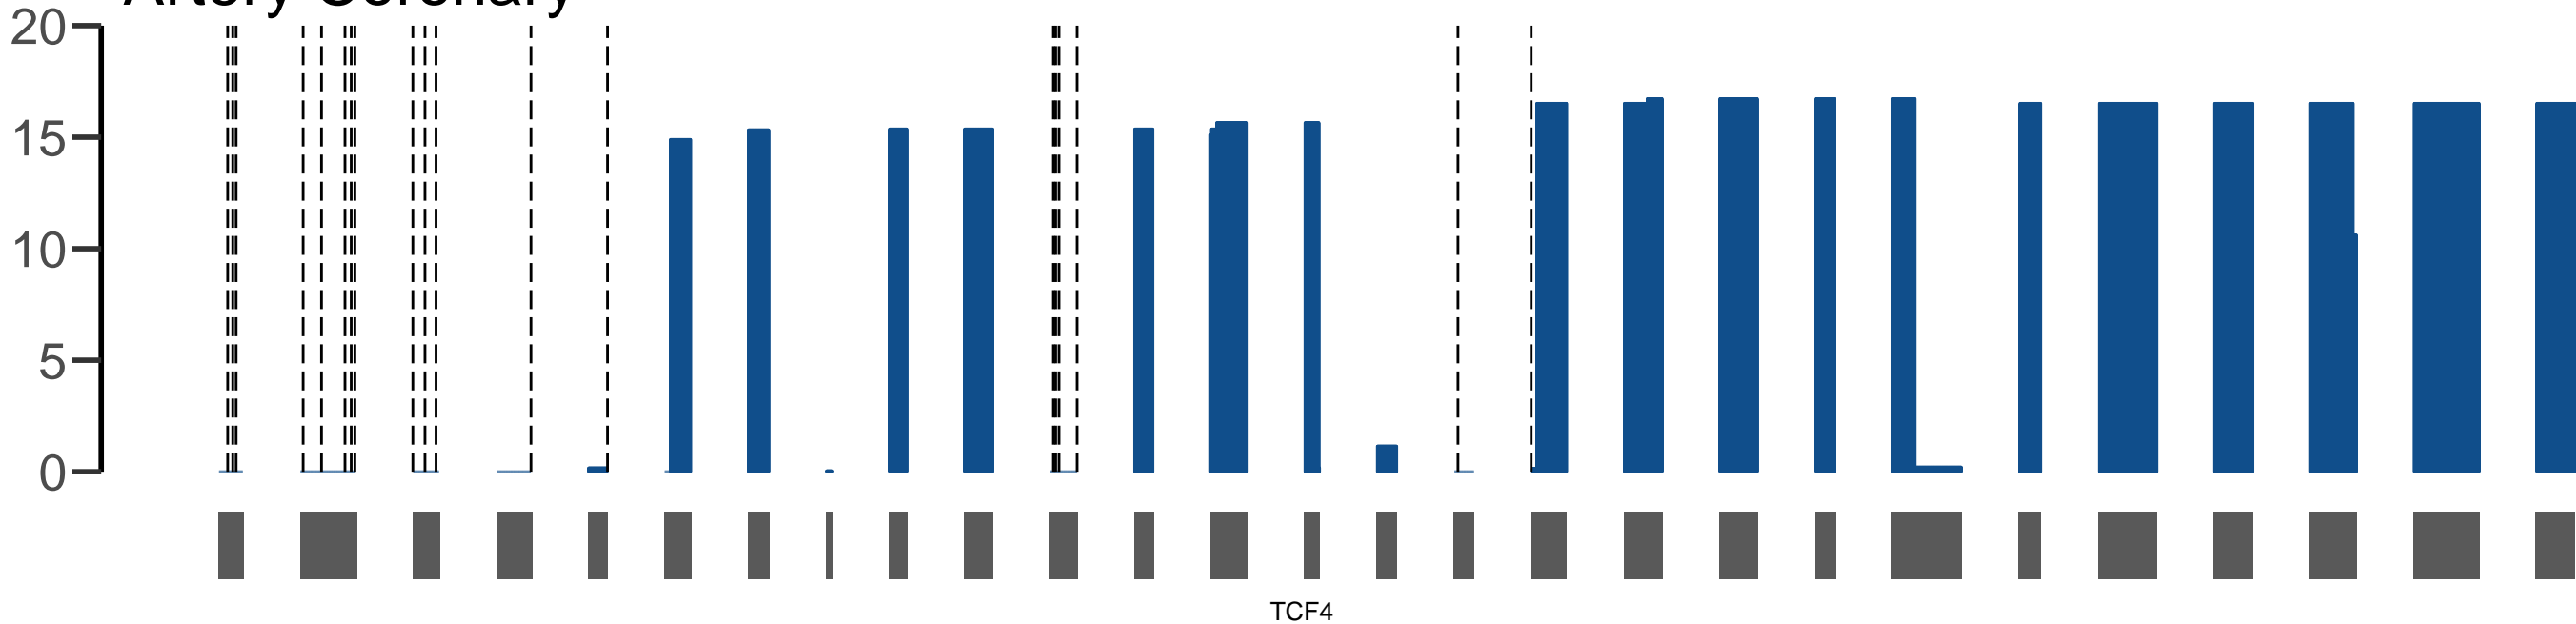

# Artery Tibial

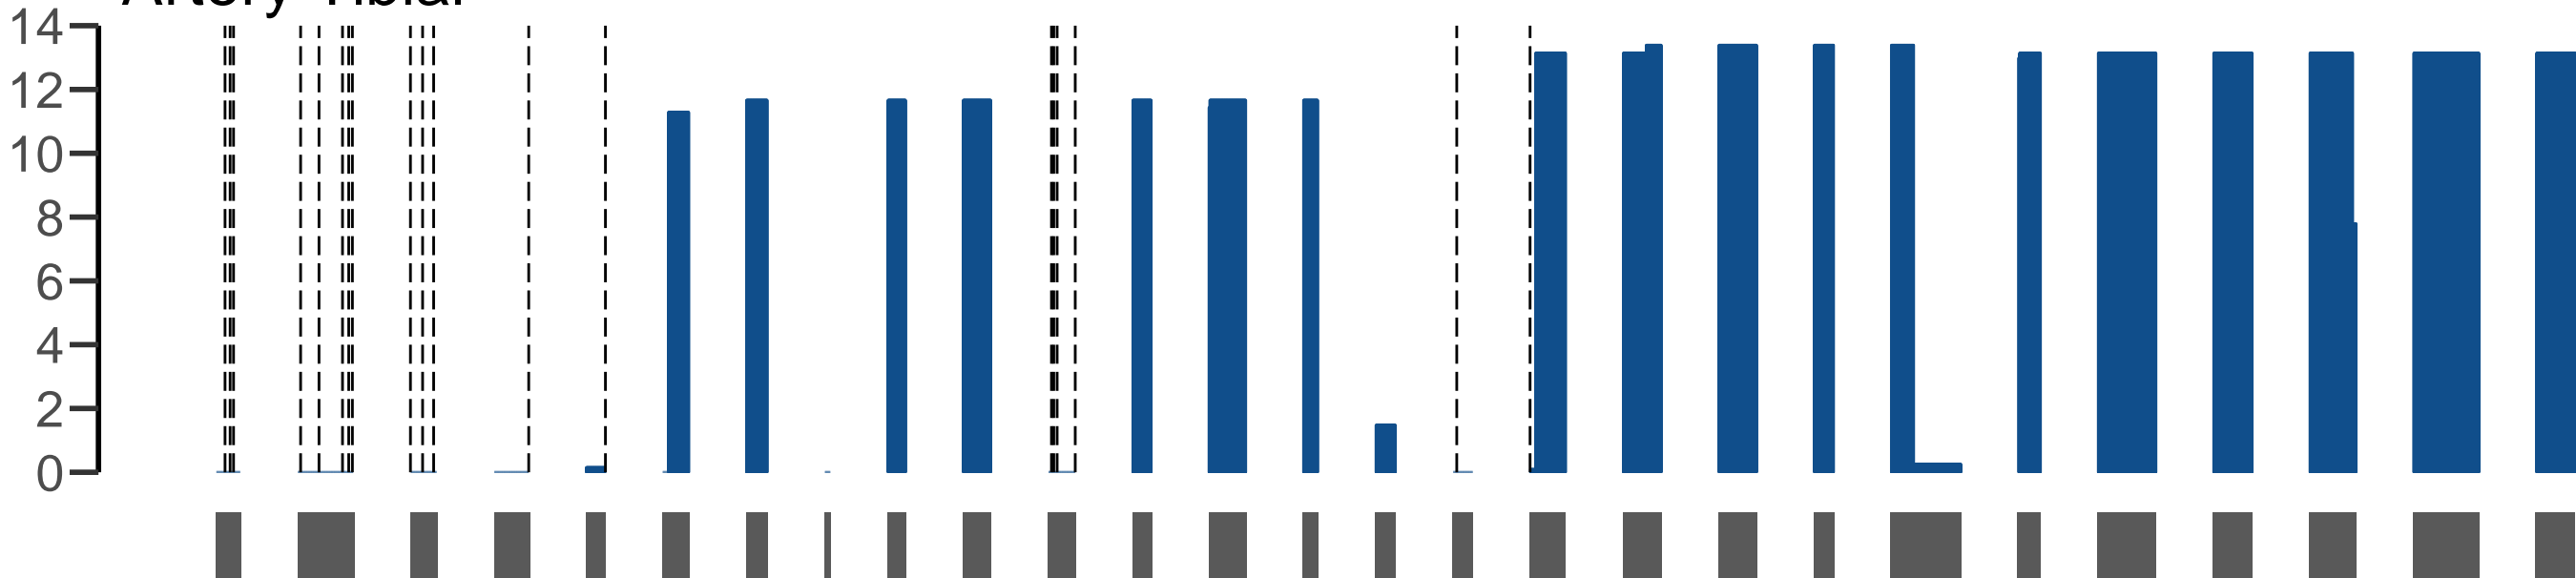

TCF4

# Brain Amygdala

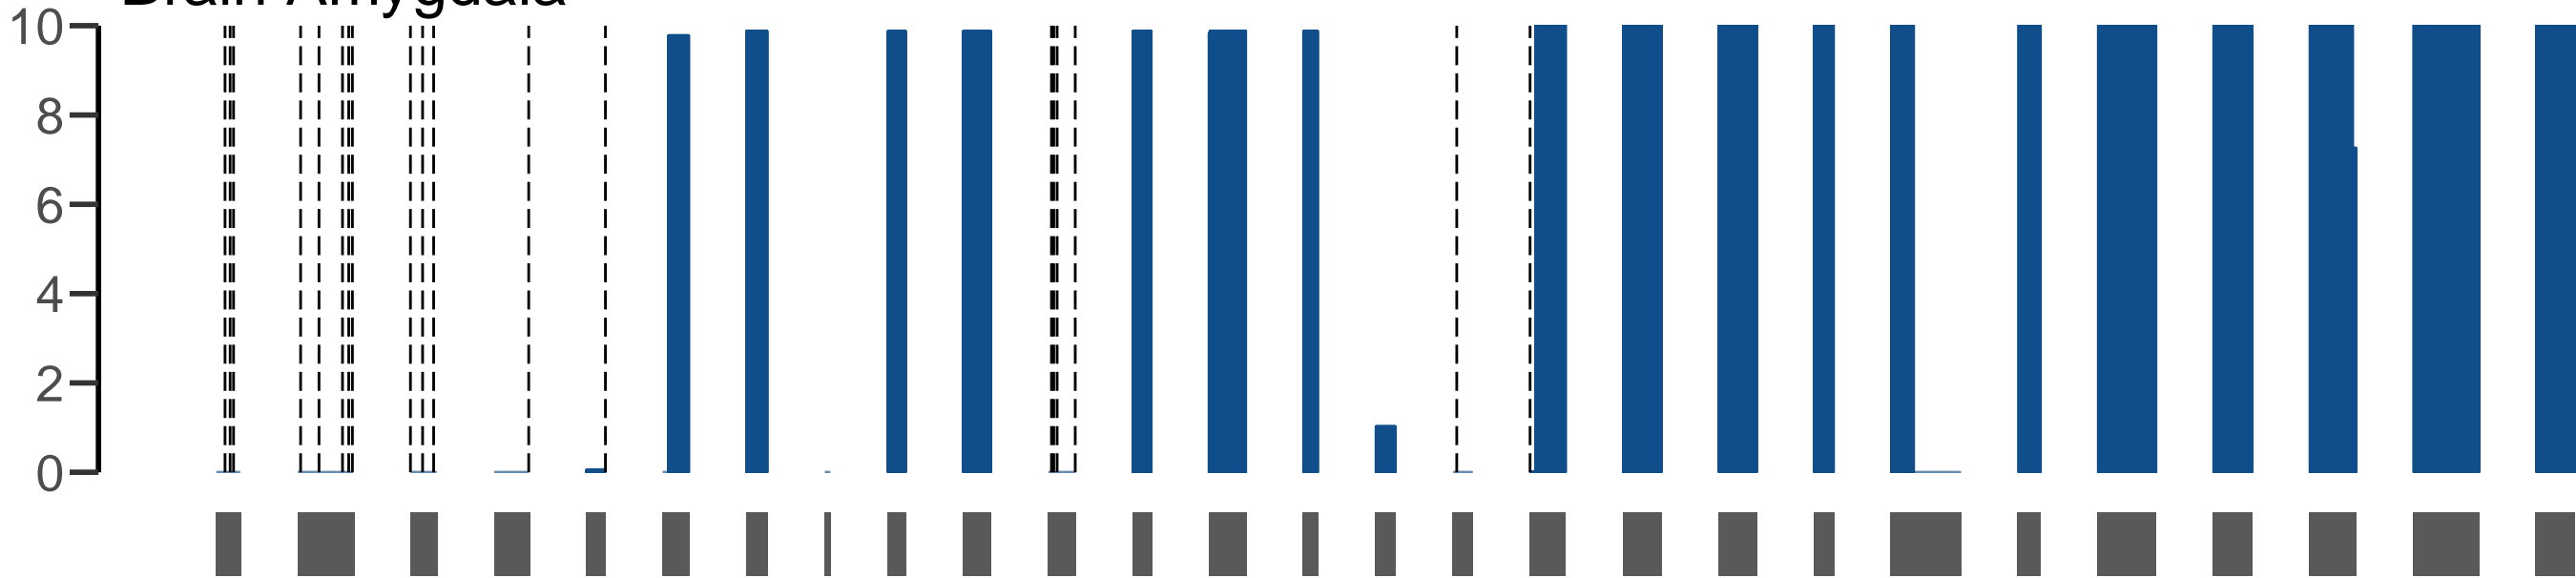

TCF4

# Brain Anteriorcingulatecortex BA24

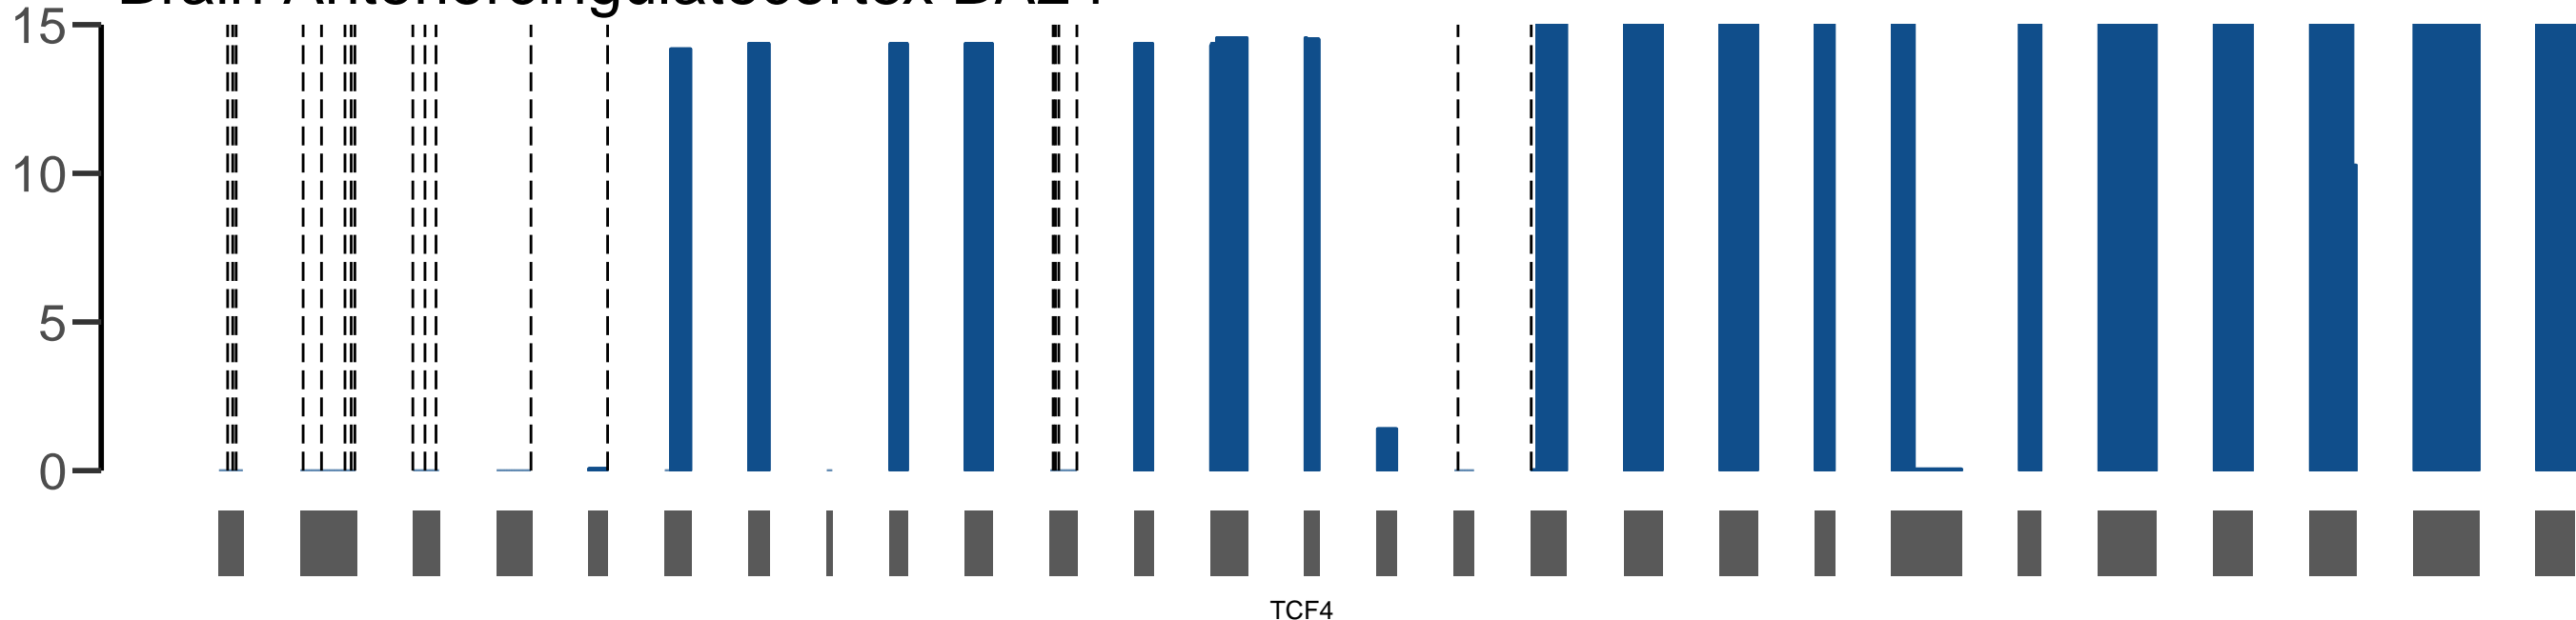



# Brain Caudate basalganglia

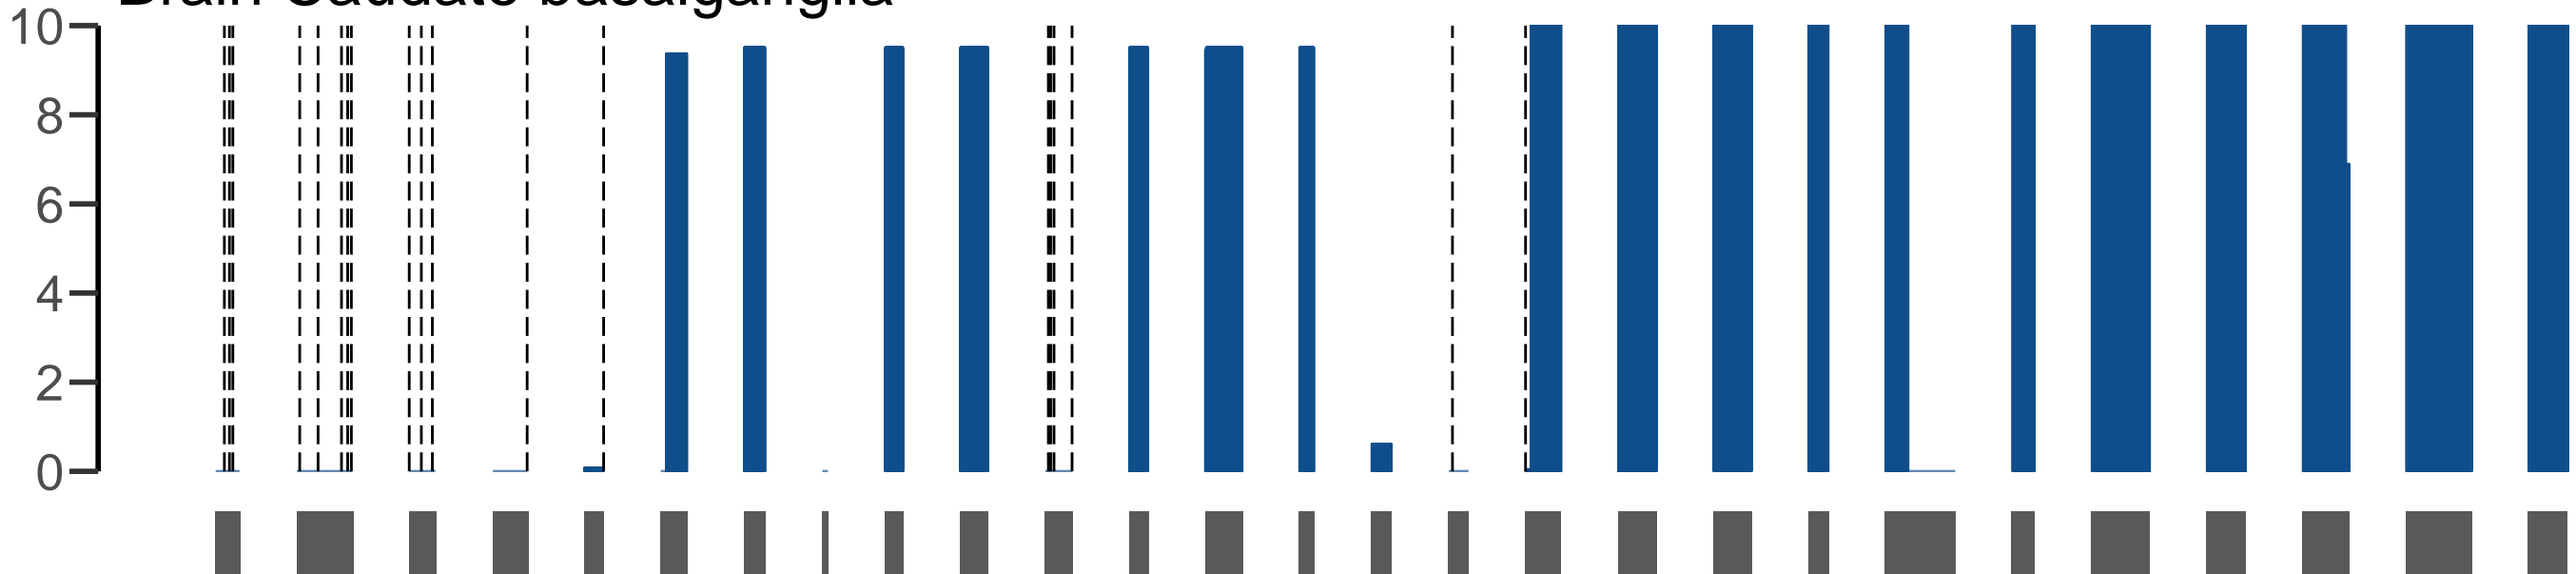

TCF4

# Brain CerebellarHemisphere

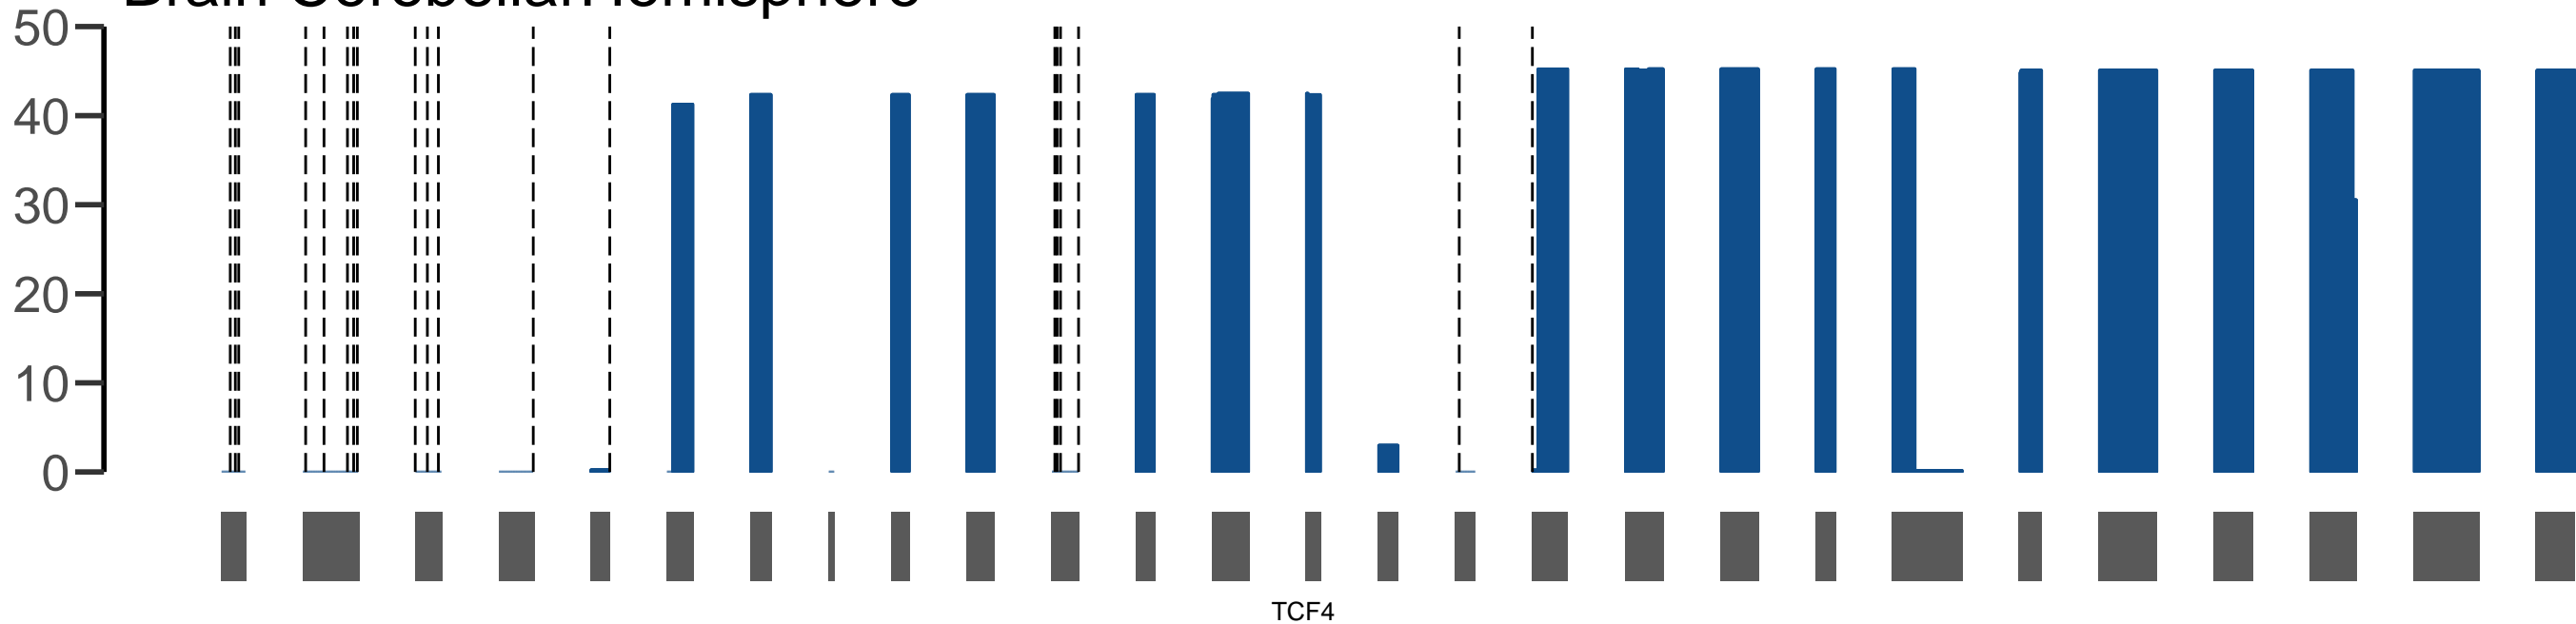

# Brain Cerebellum

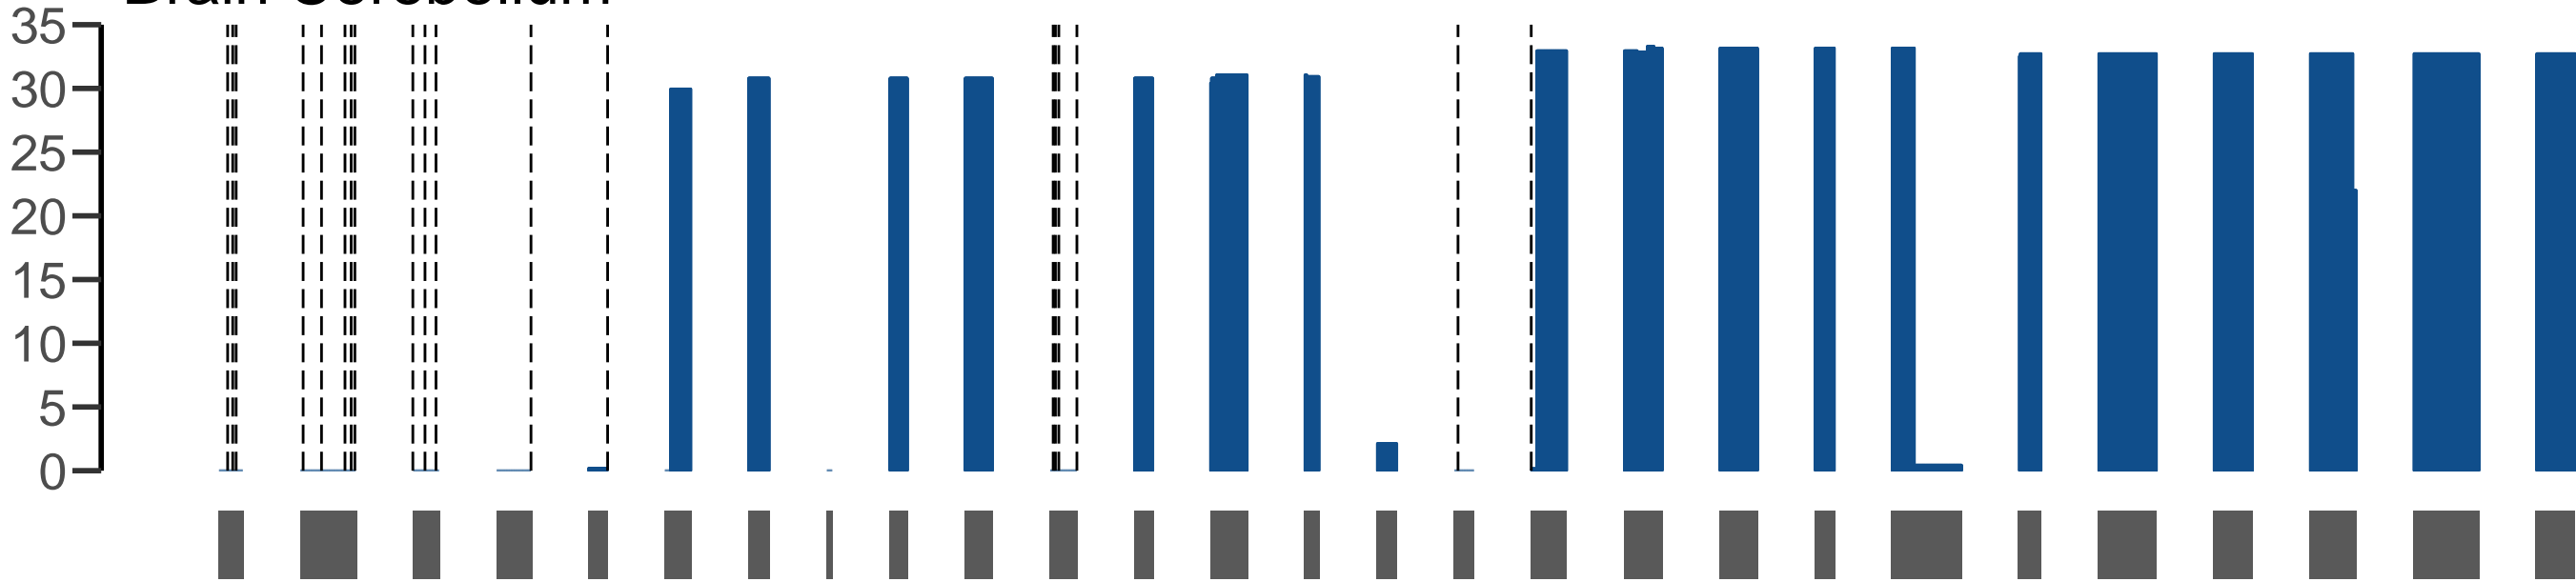

TCF4

# Brain Cortex

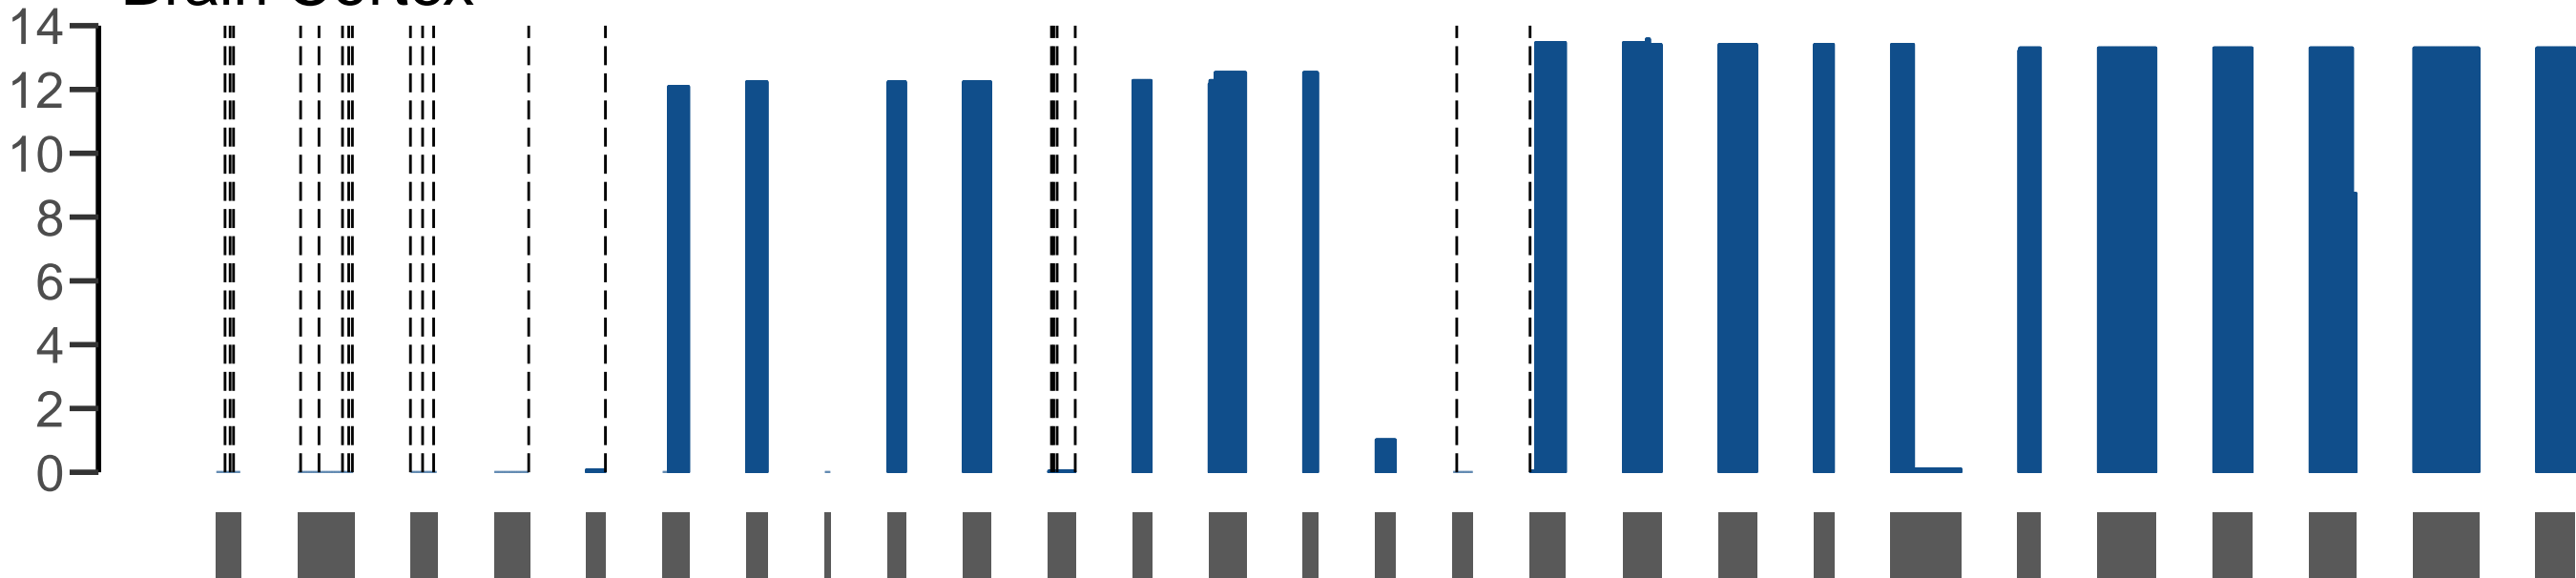

TCF4

# Brain FrontalCortex BA9

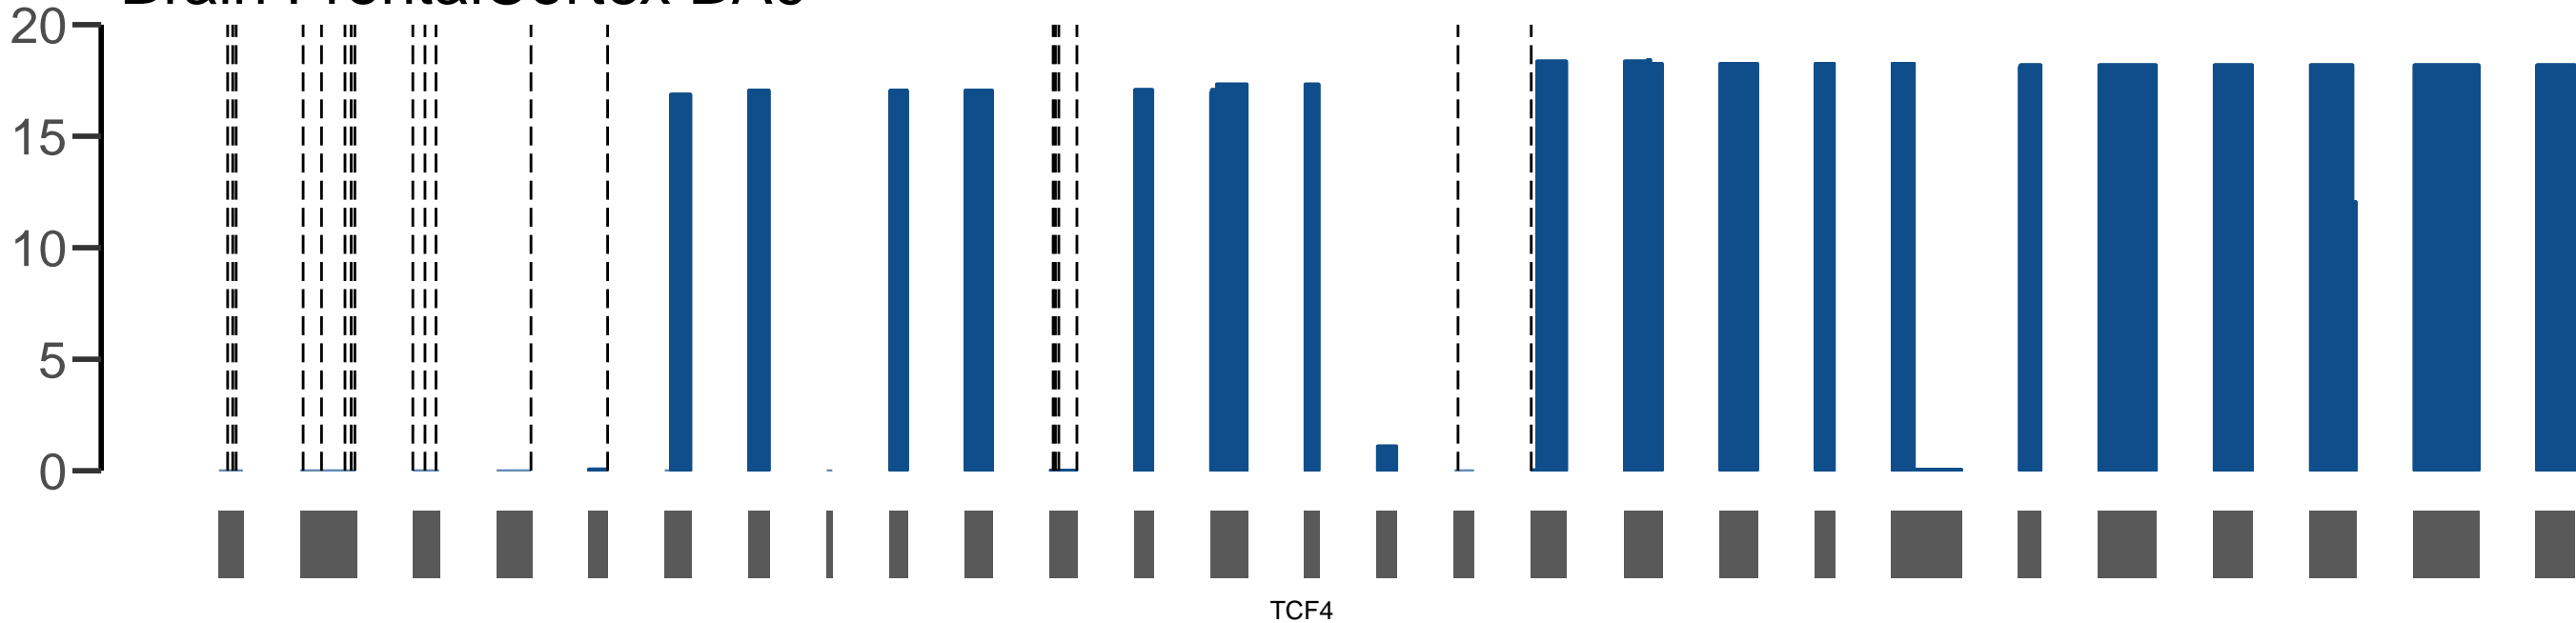

# Brain Hippocampus

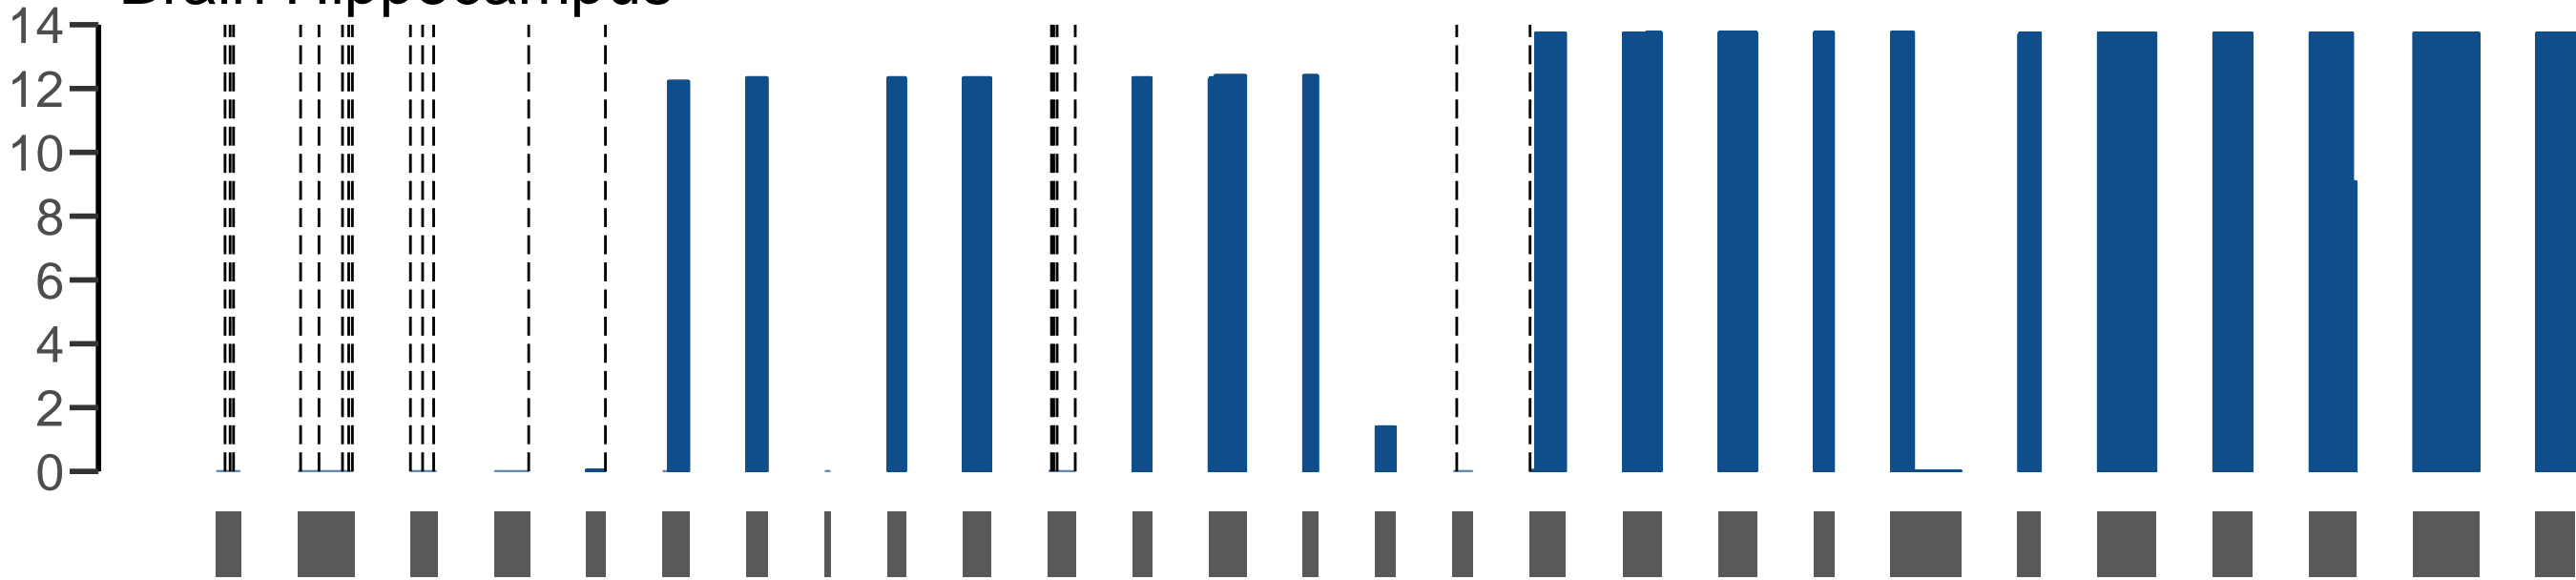

TCF4

# Brain Hypothalamus

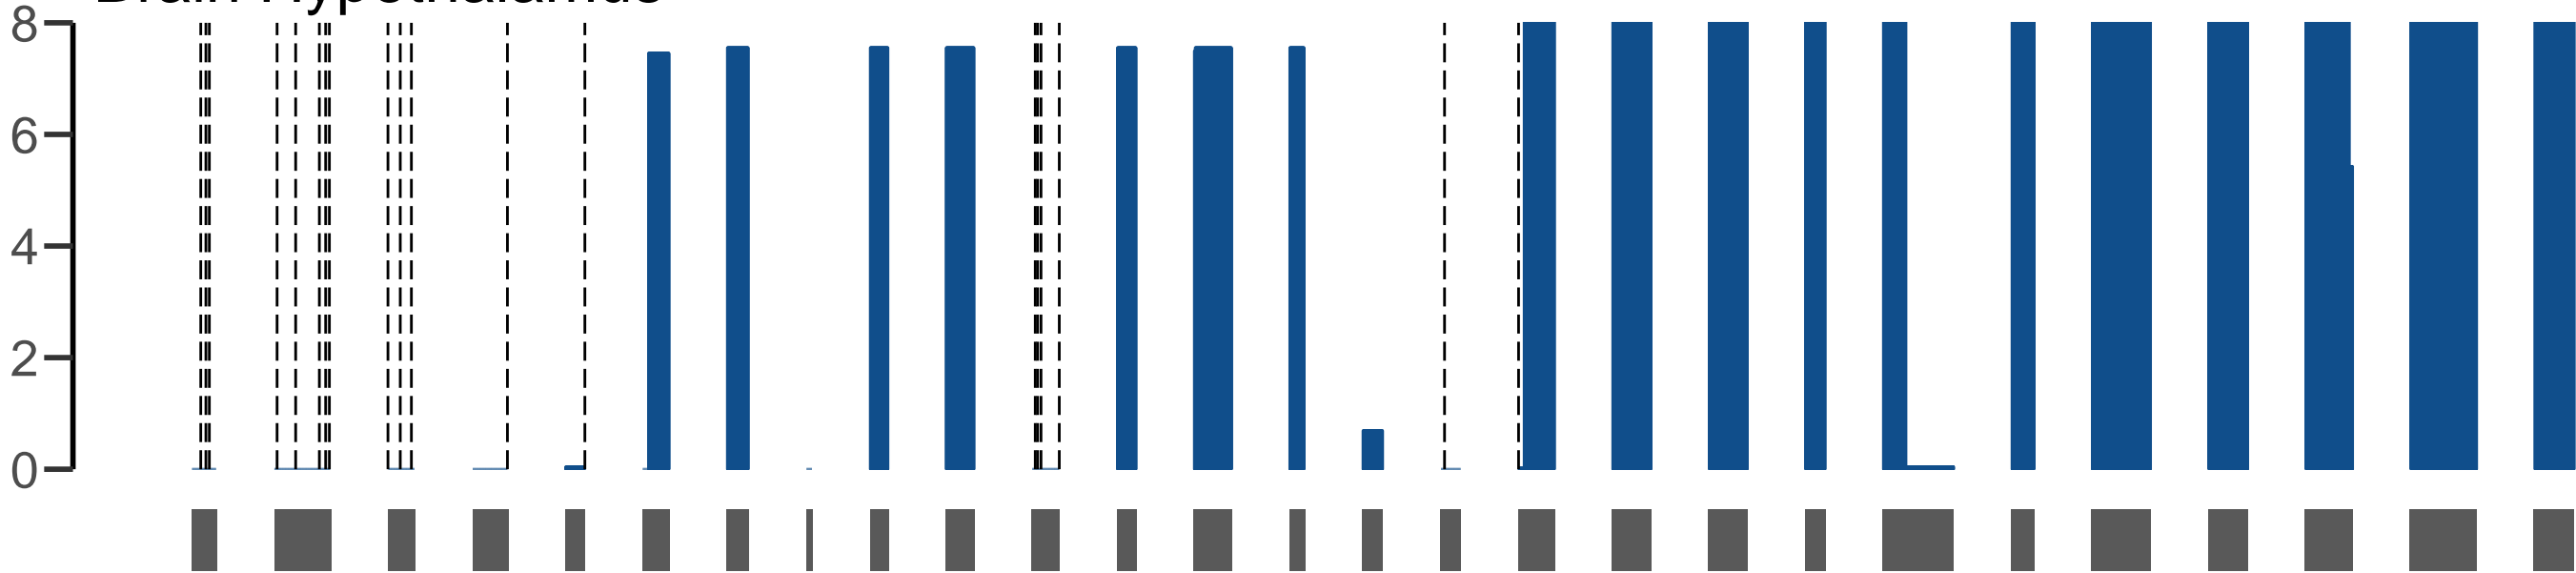

TCF4

# Brain Nucleus accumbens basal ganglia

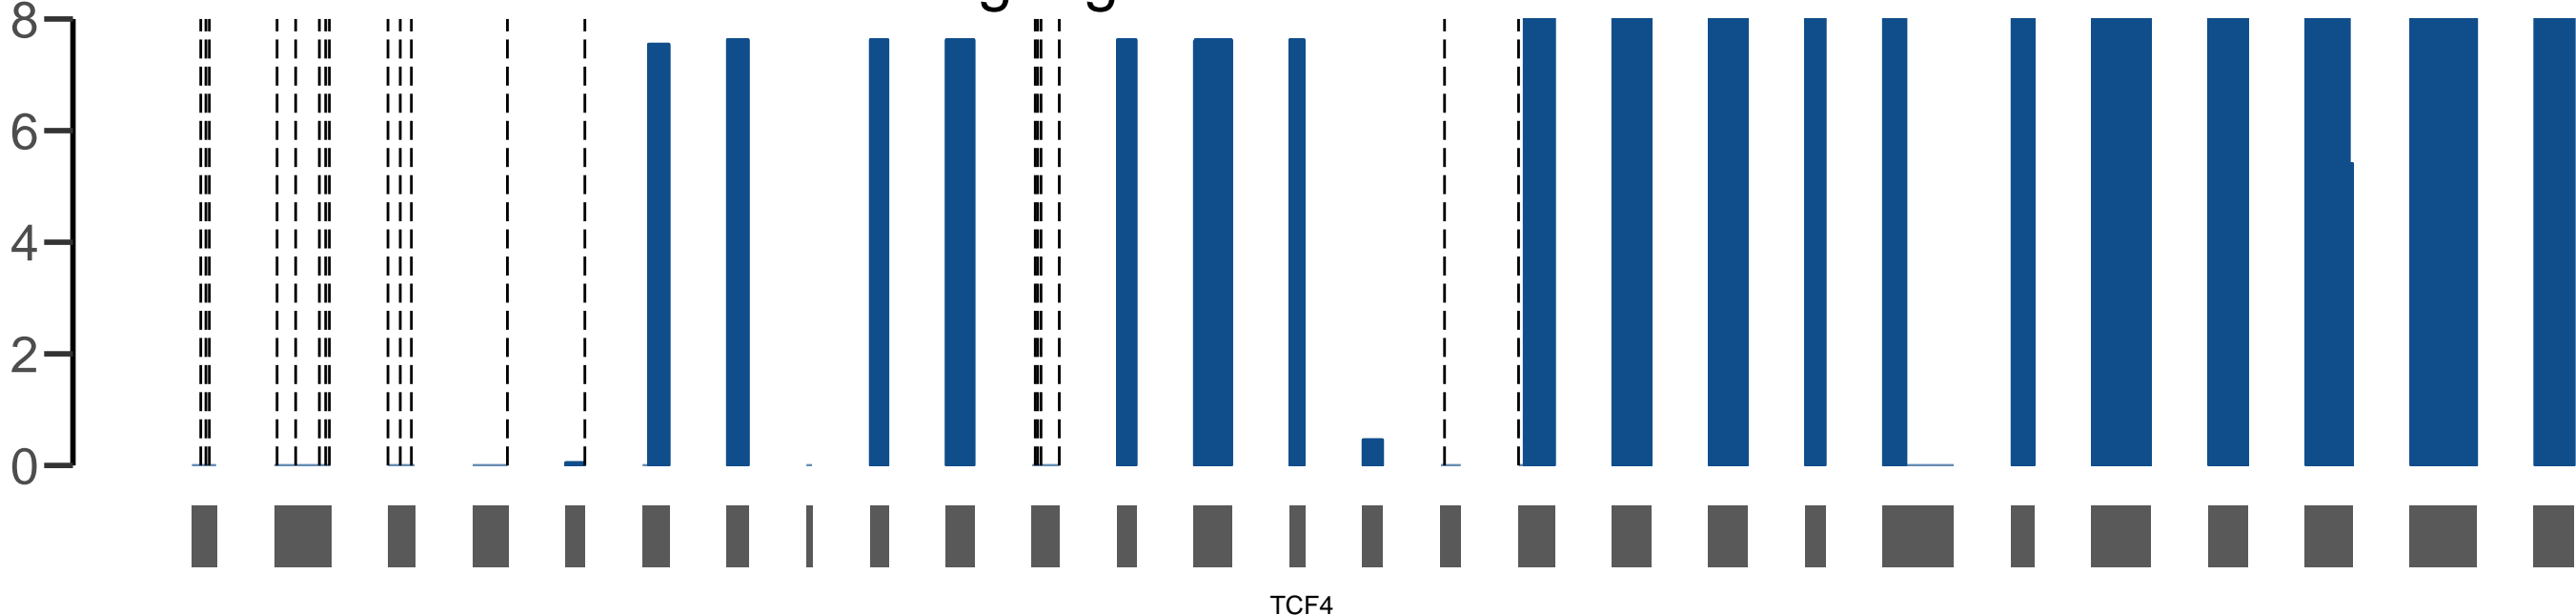



# Brain Putamen basalganglia

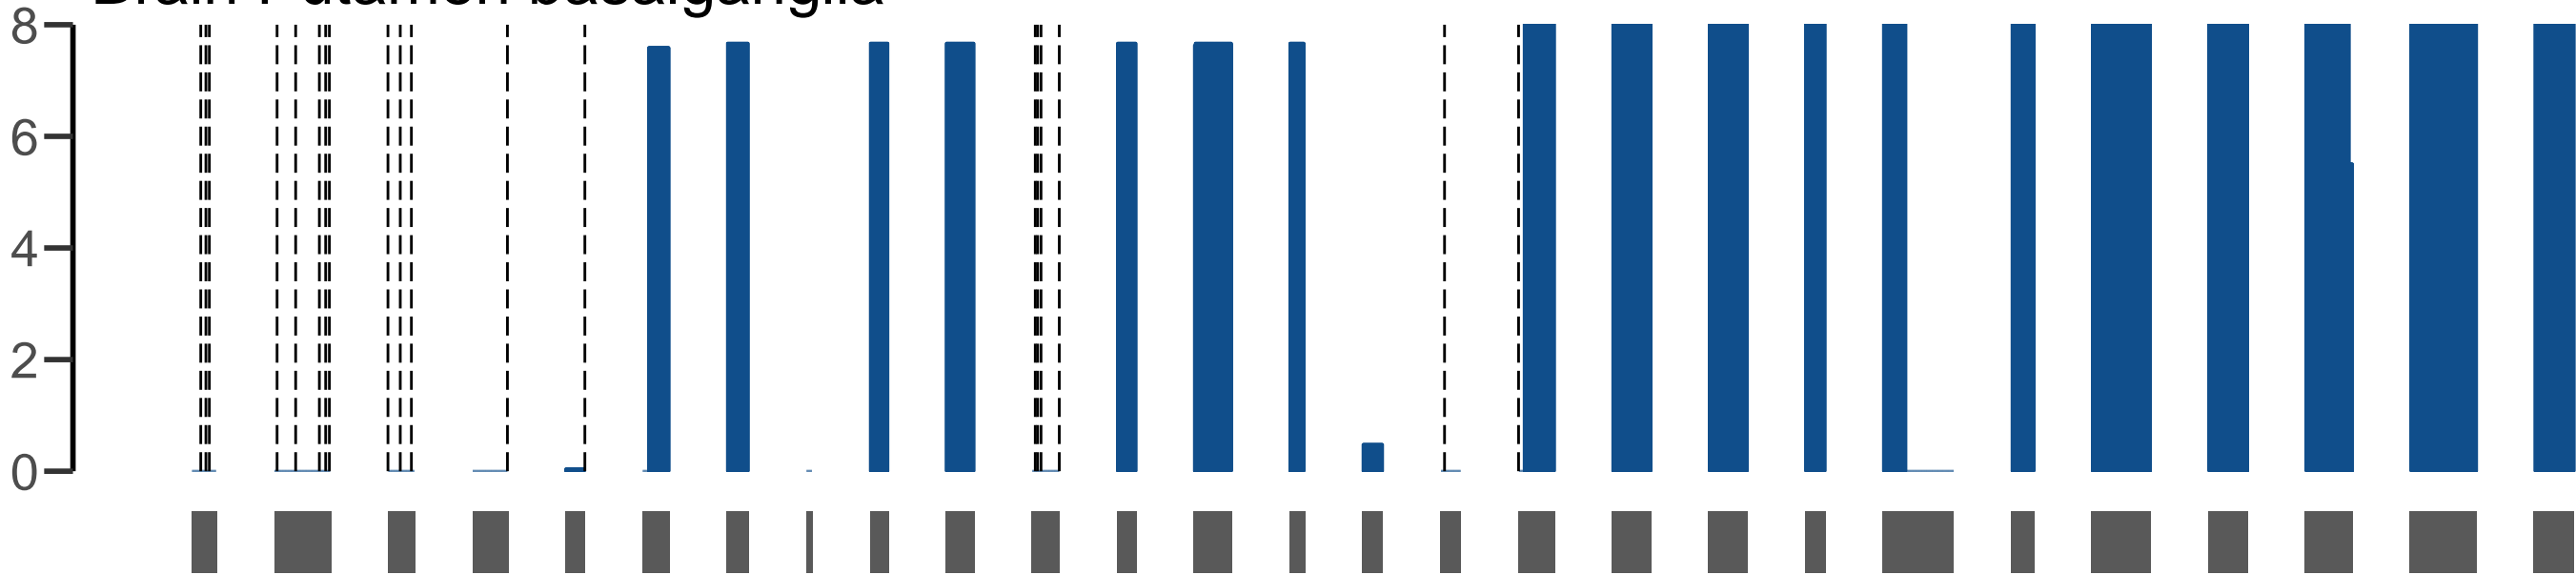

TCF4

# Breast MammaryTissue

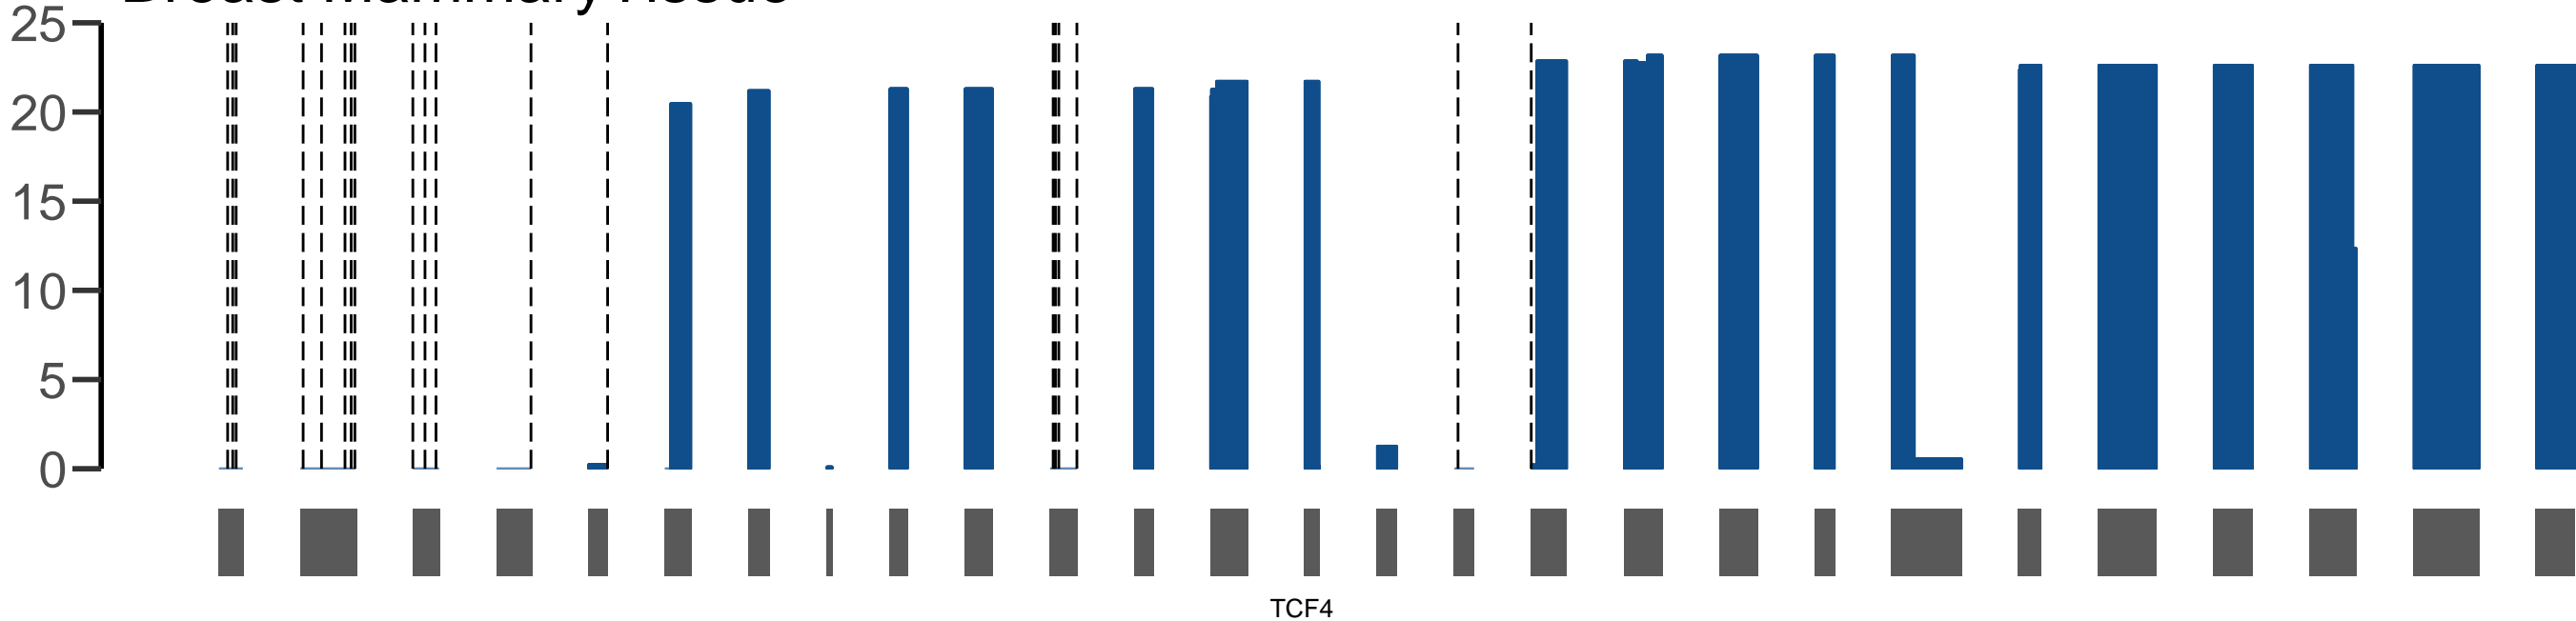

# Colon Sigmoid

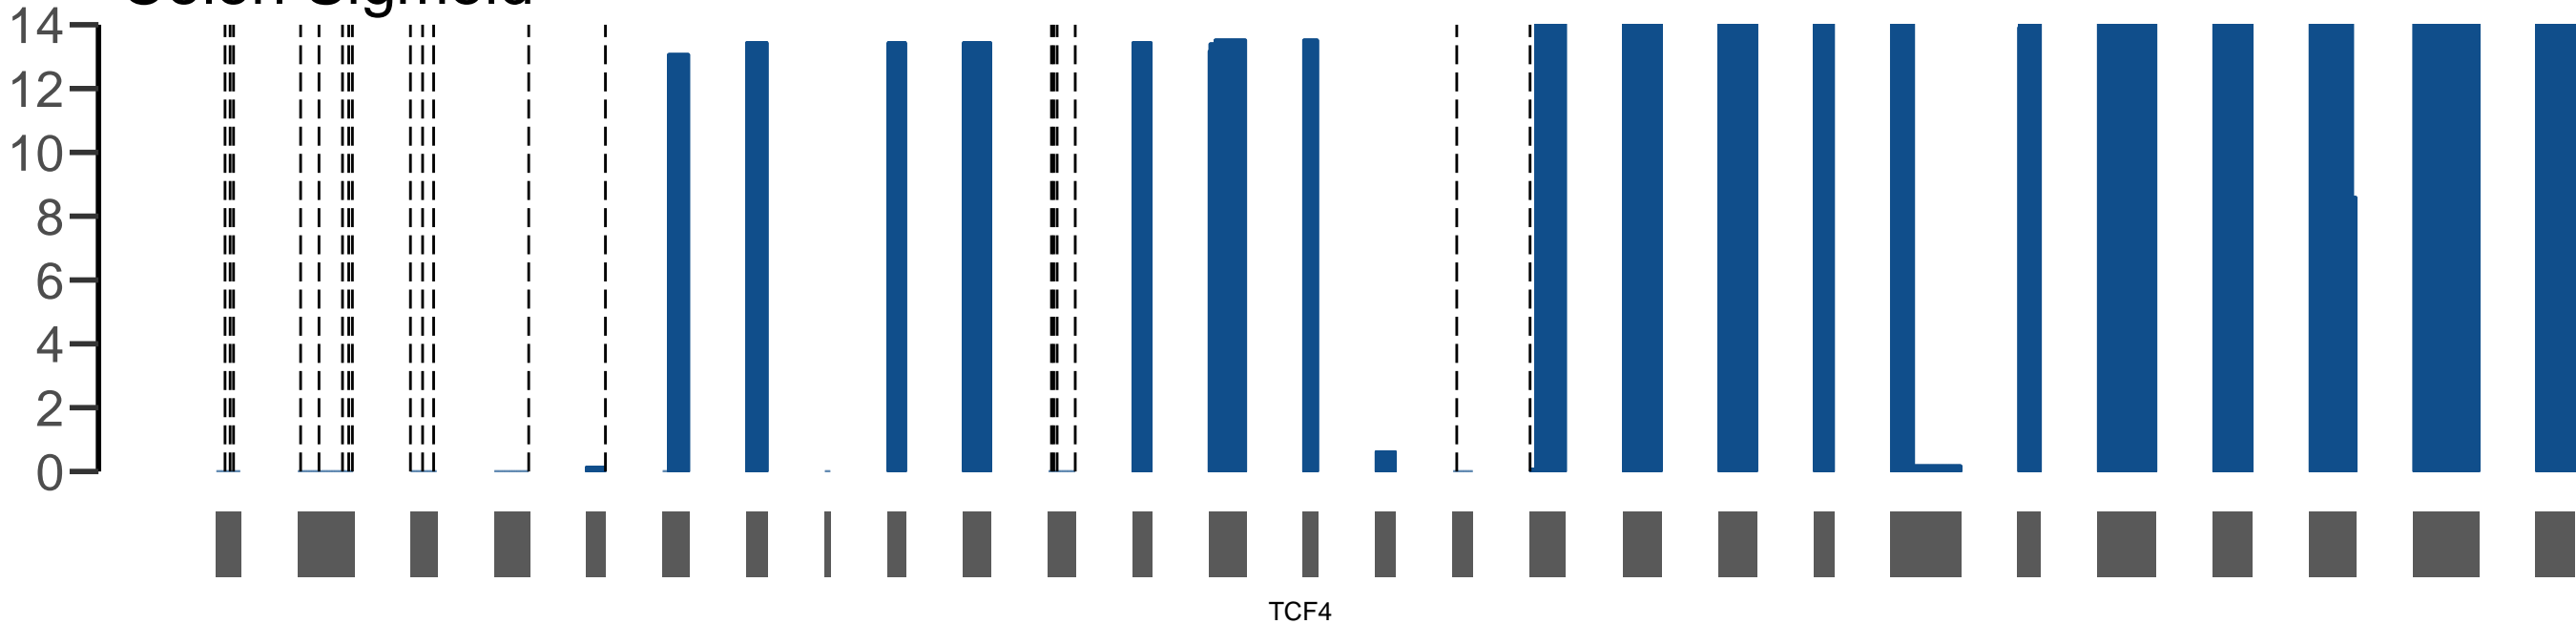

# Colon Transverse

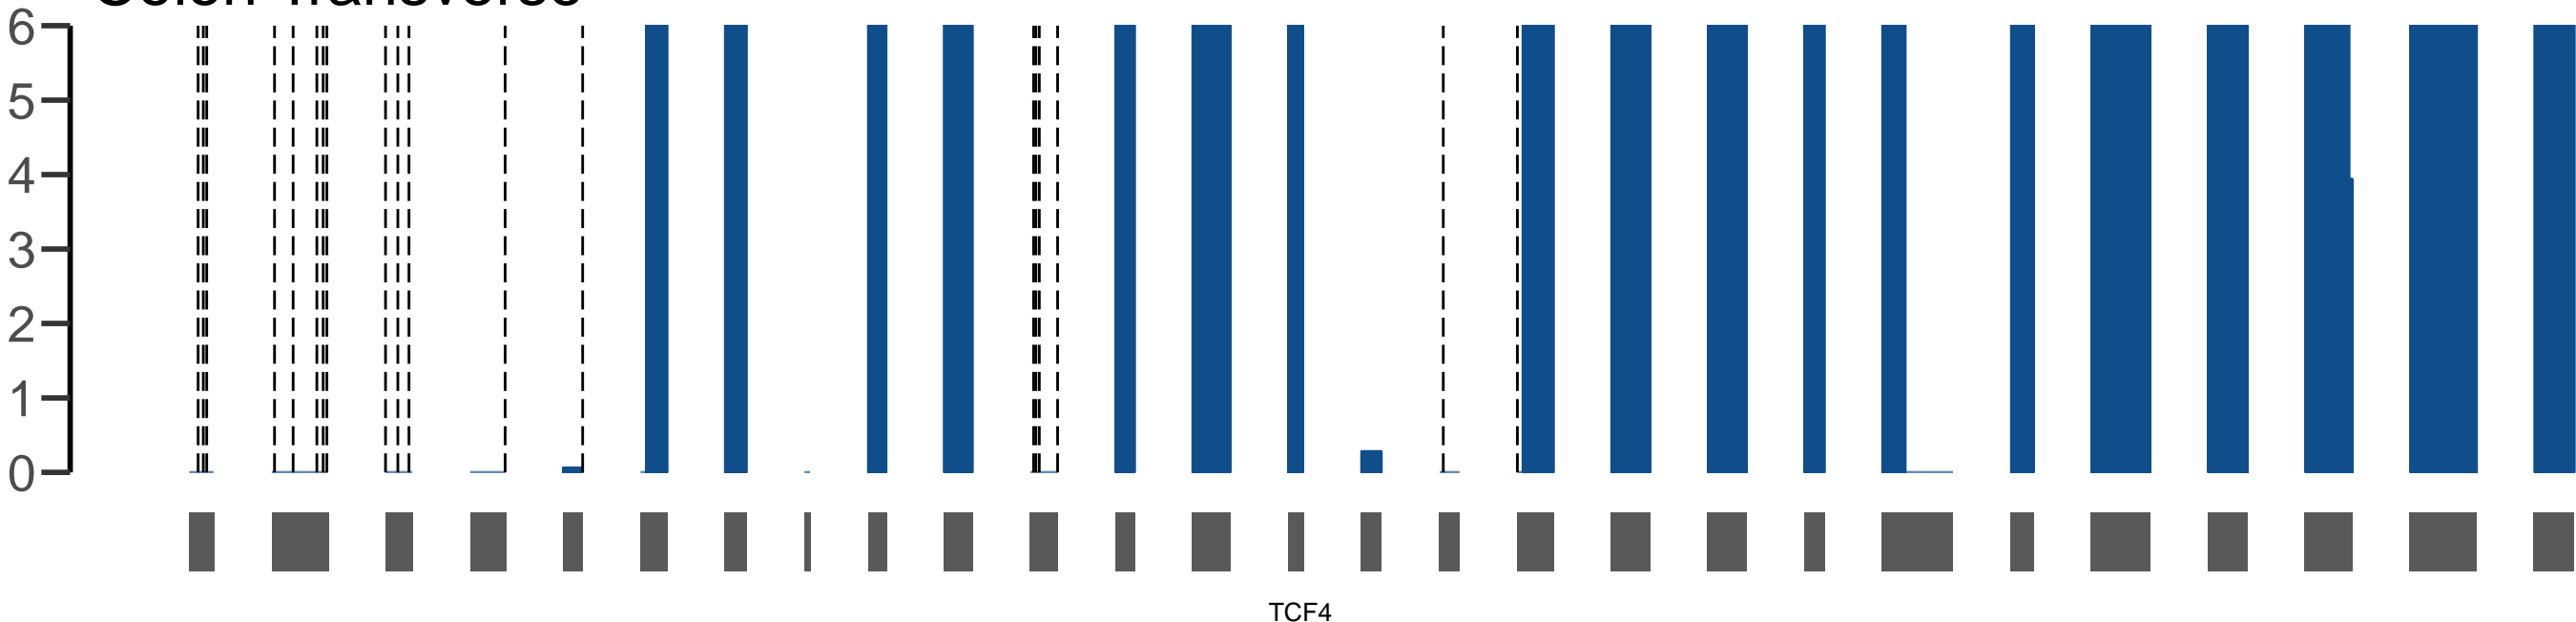

# Esophagus Gastroesophageal Junction

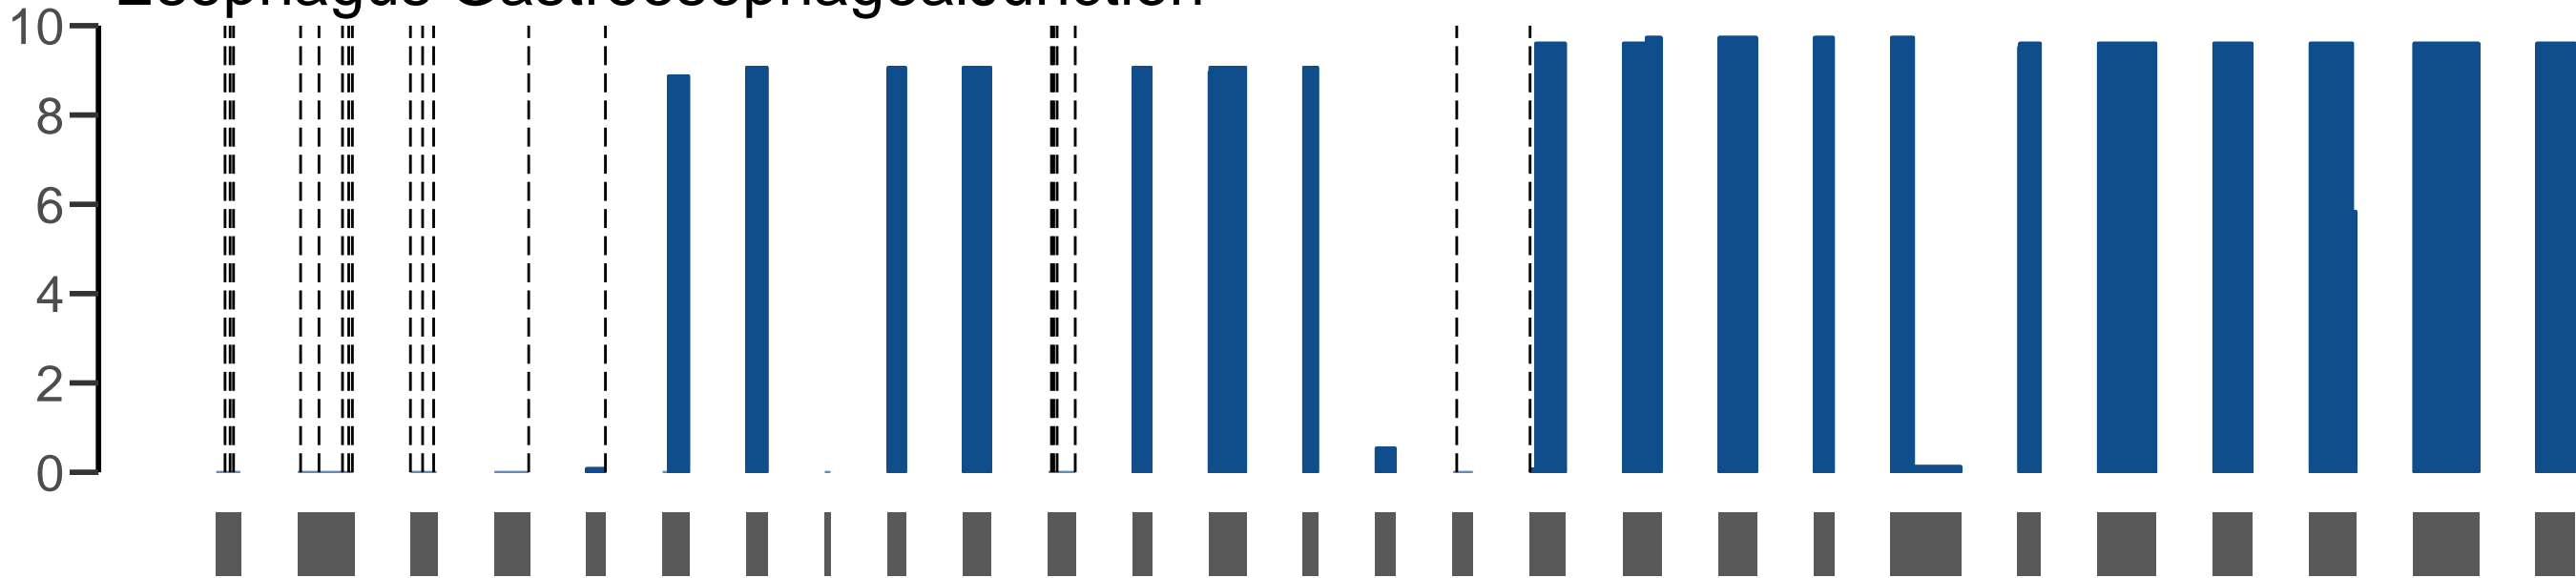

TCF4

# Esophagus Mucosa

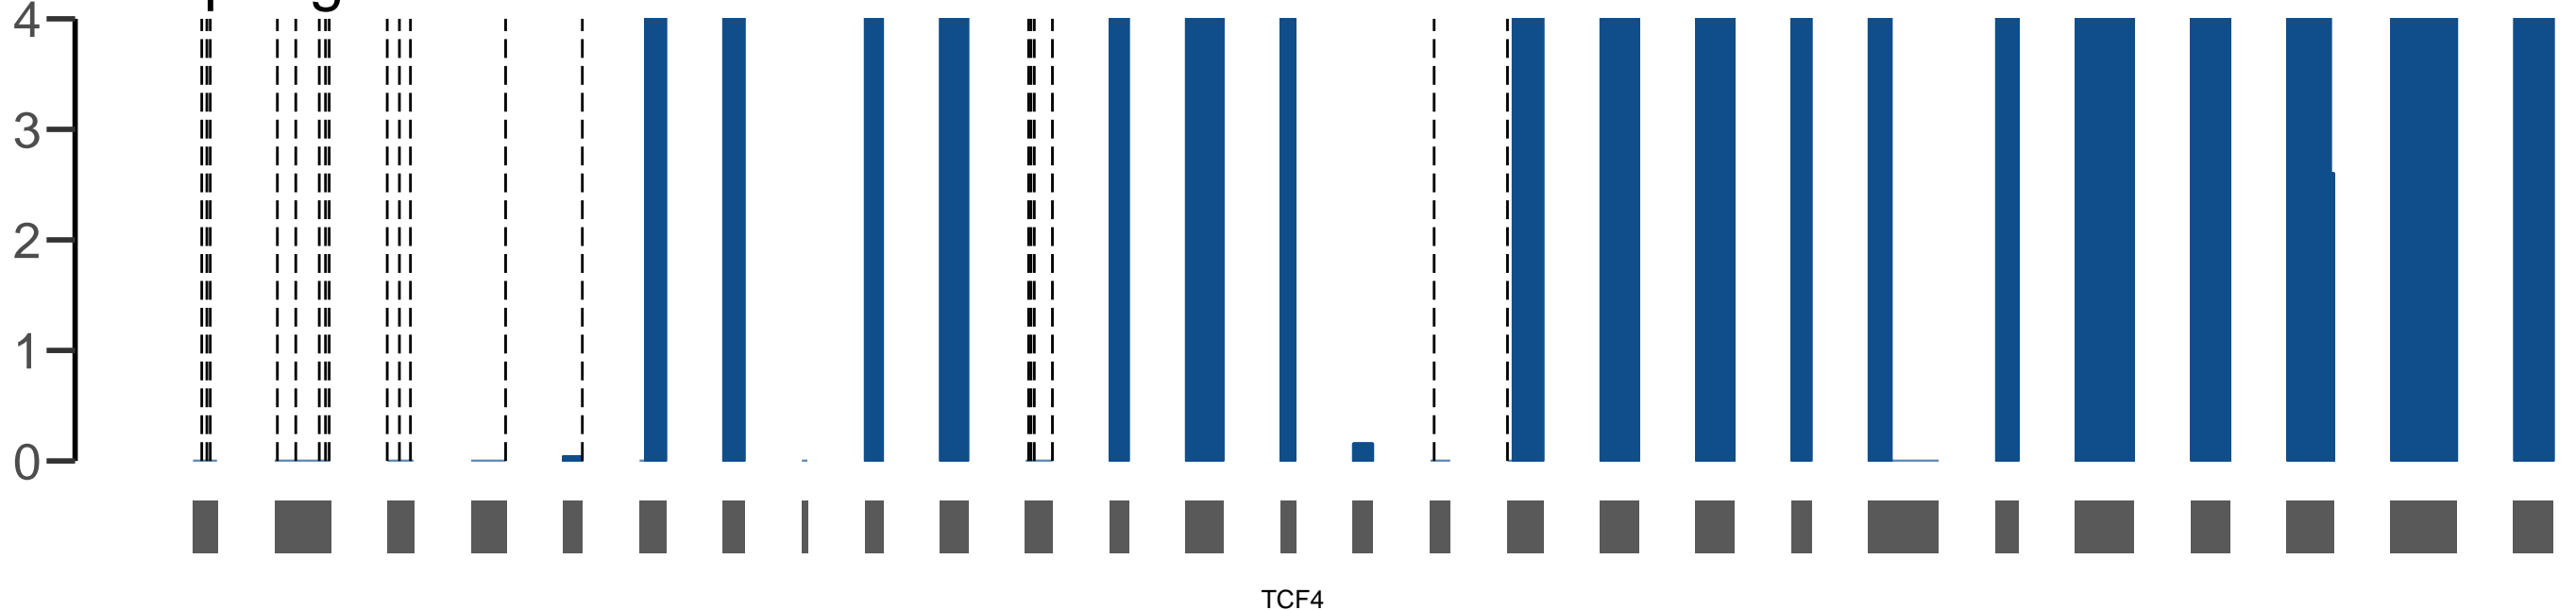

# Esophagus Muscularis

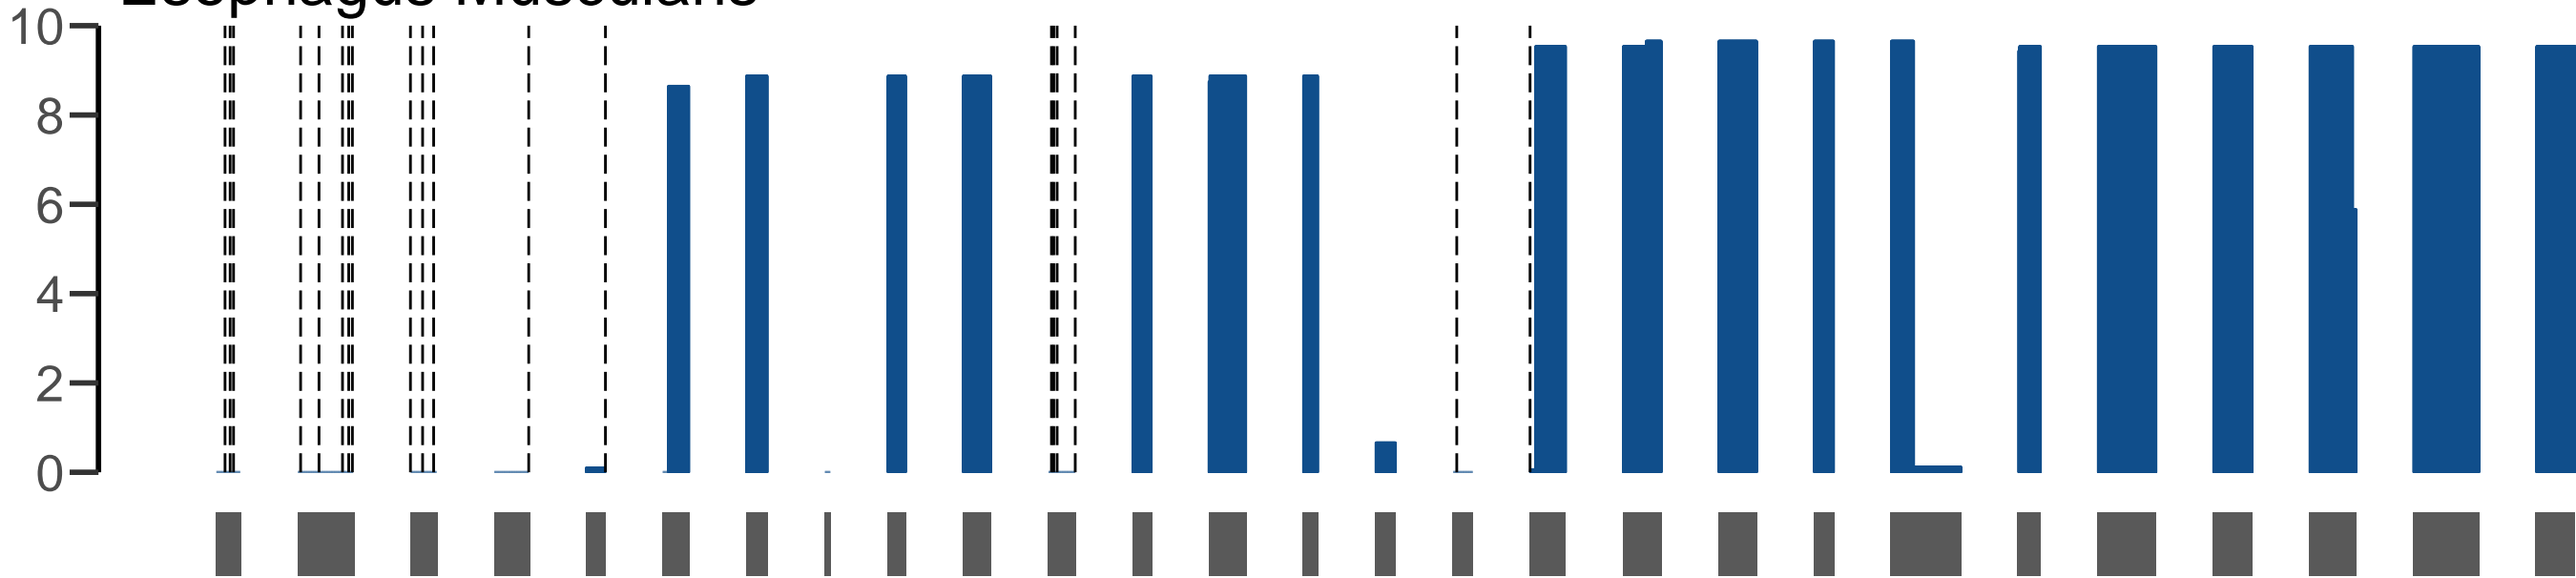

TCF4

# Heart Atrial Appendage

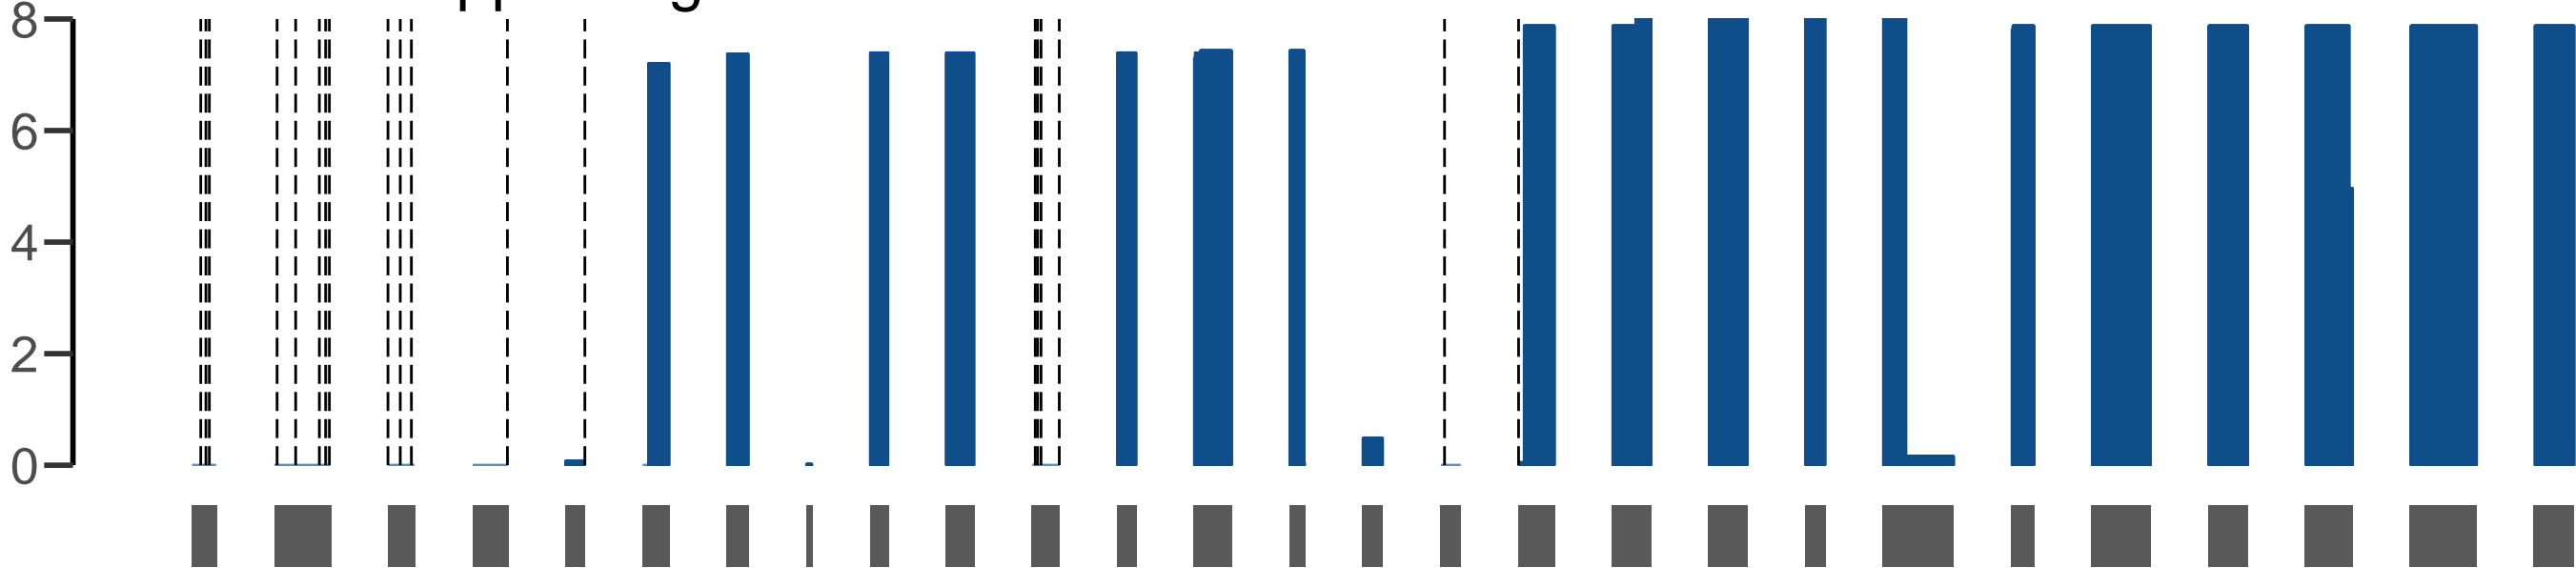

TCF4



# Heart LeftVentricle

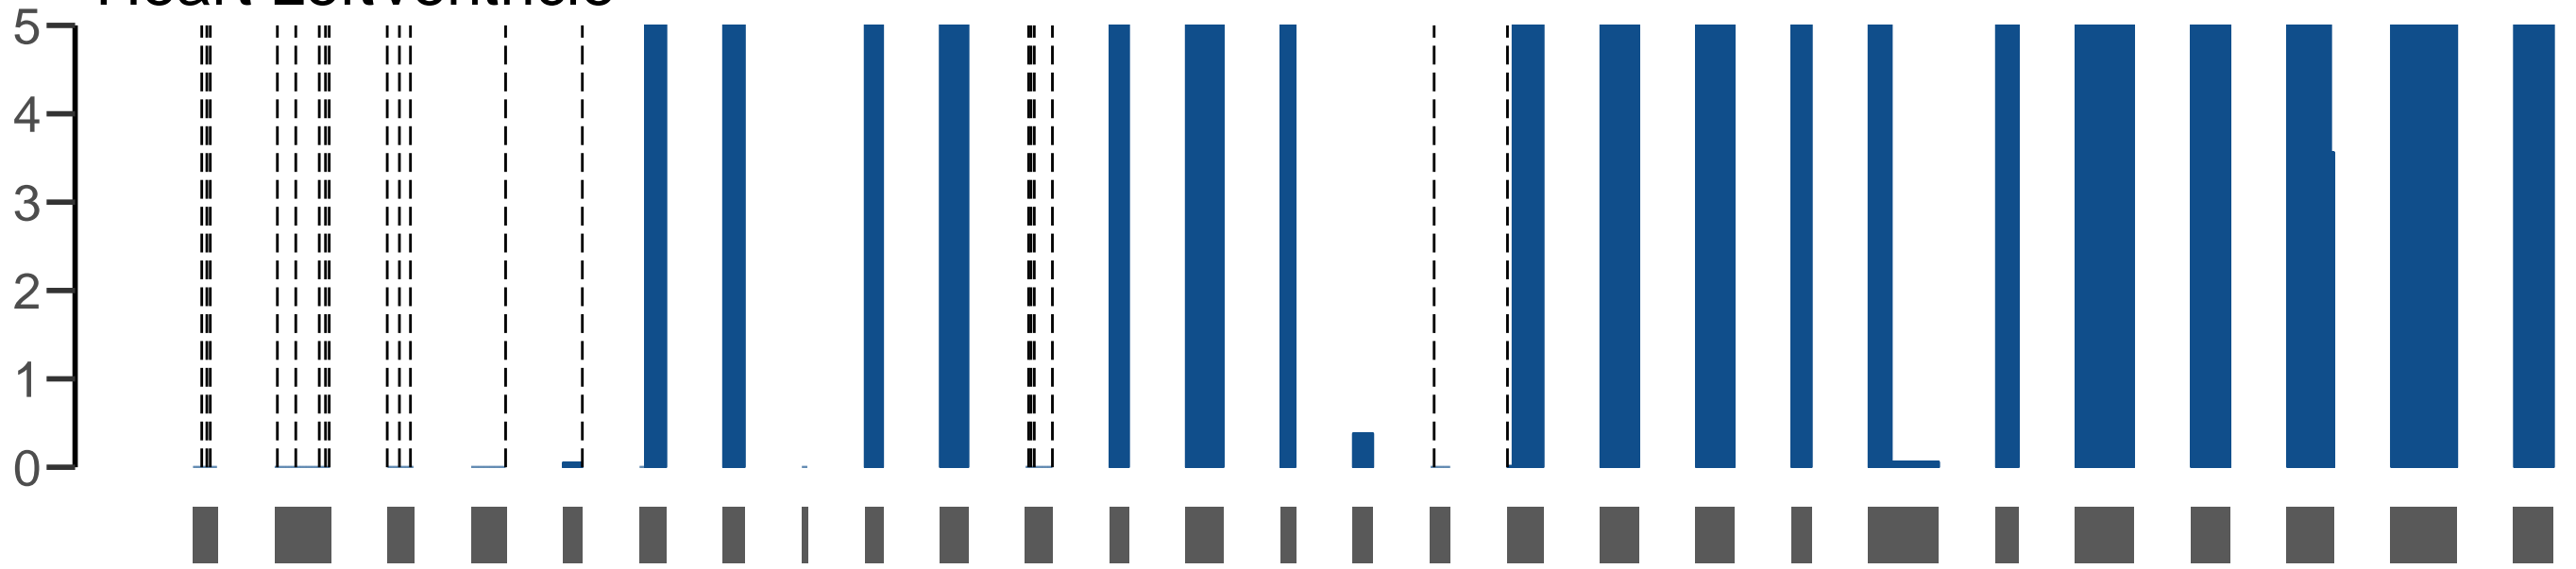

TCF4

Liver

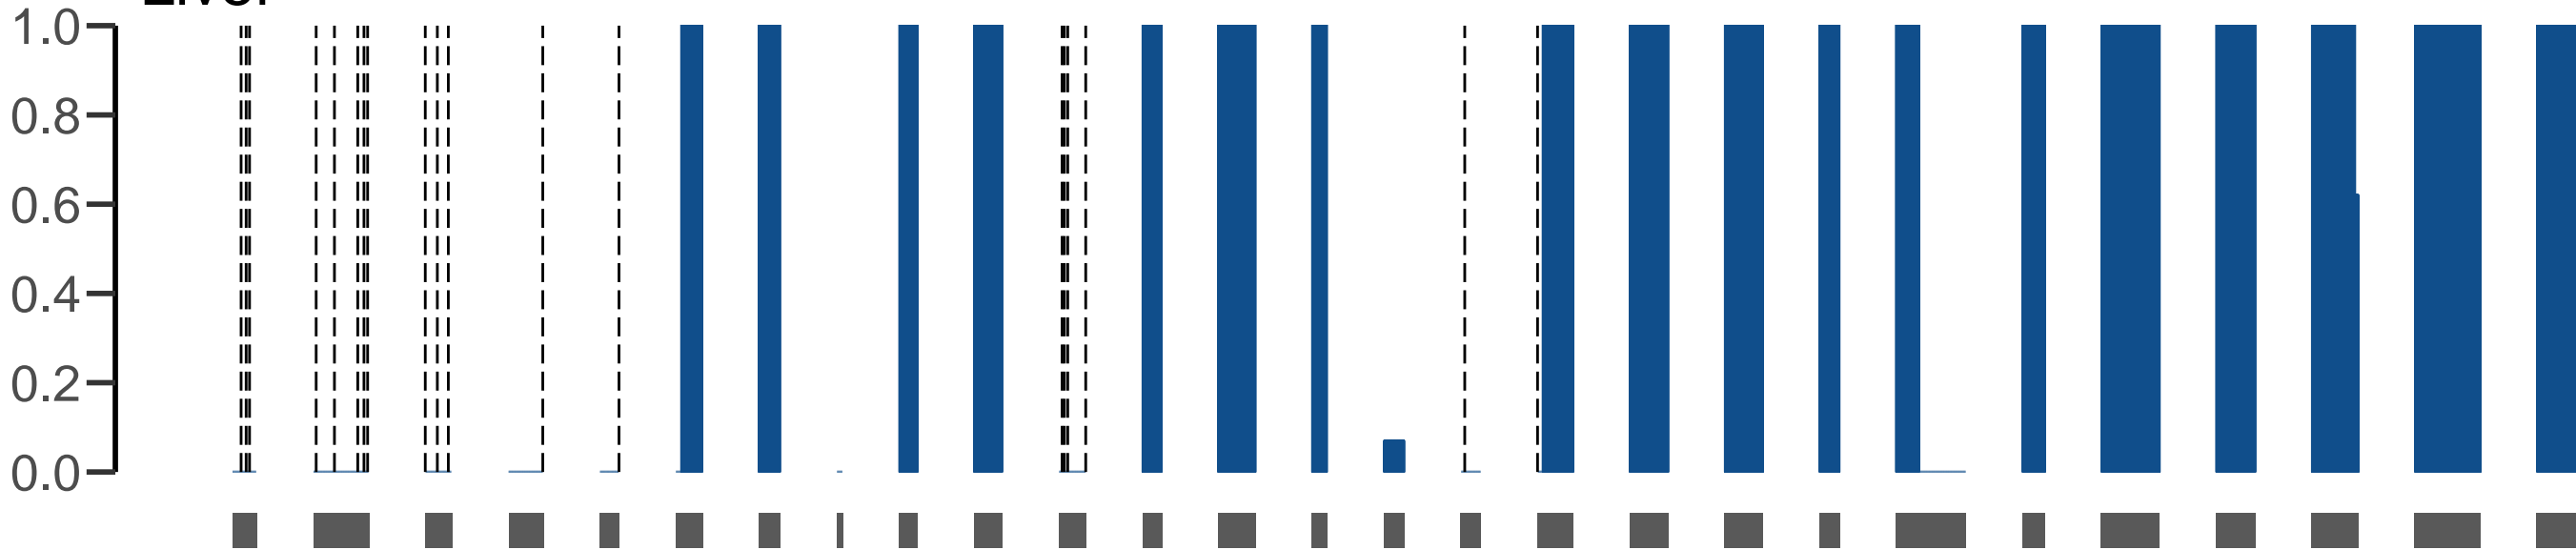

Lung

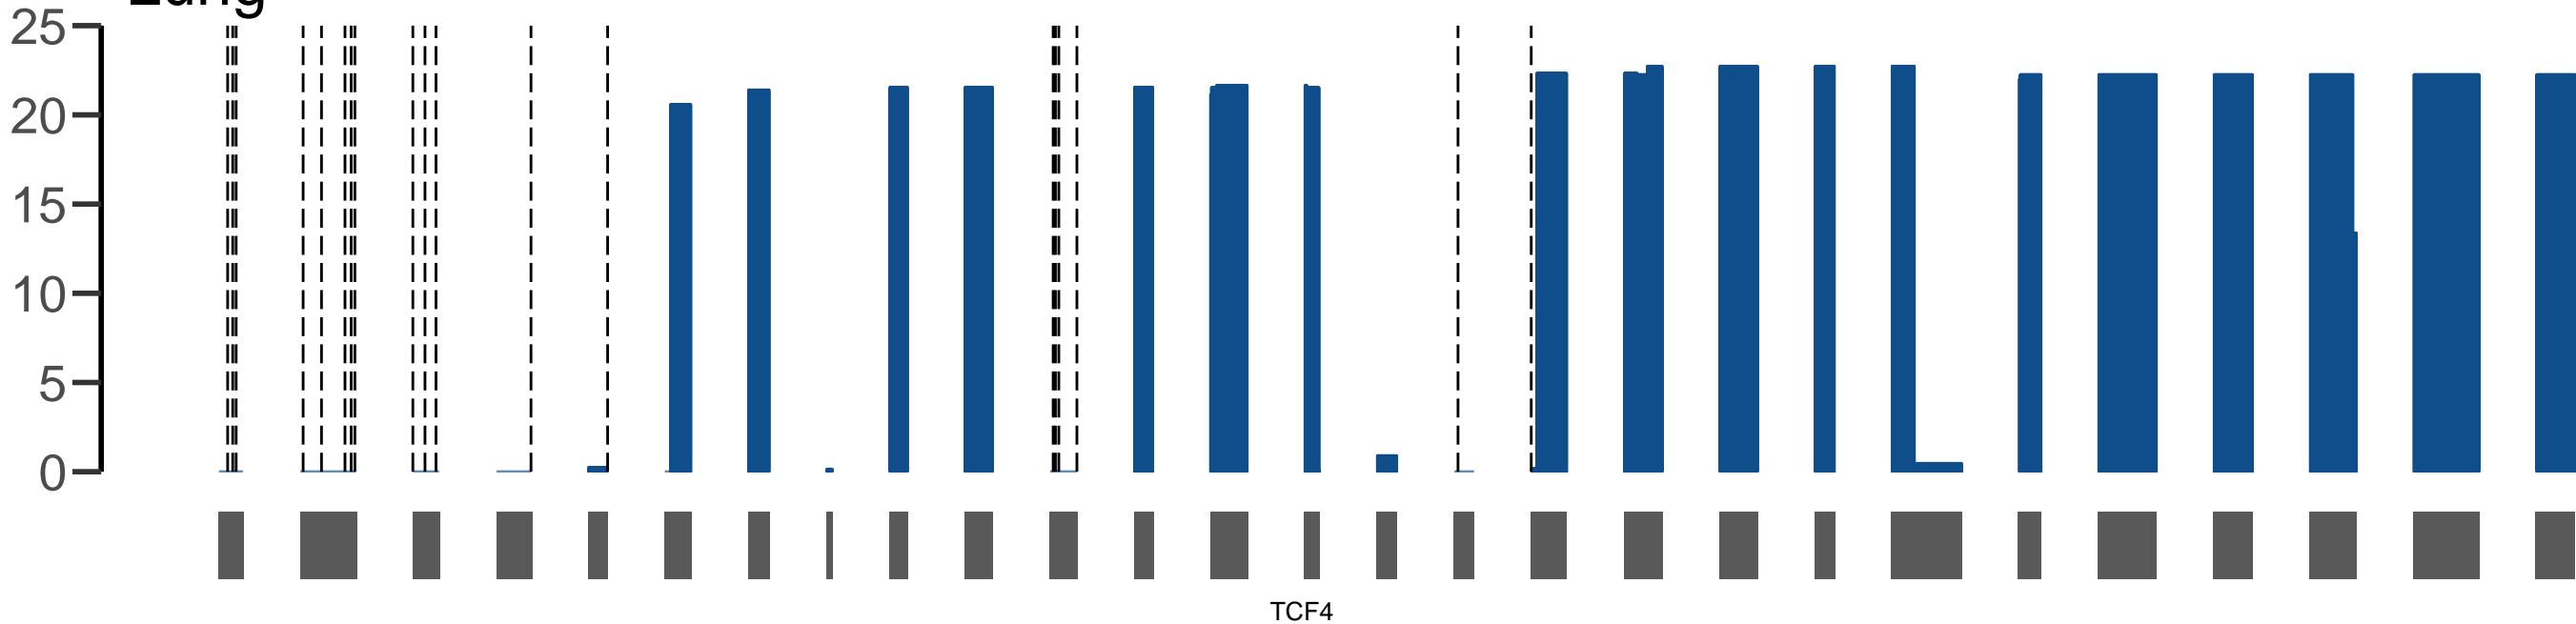

# Muscle Skeletal

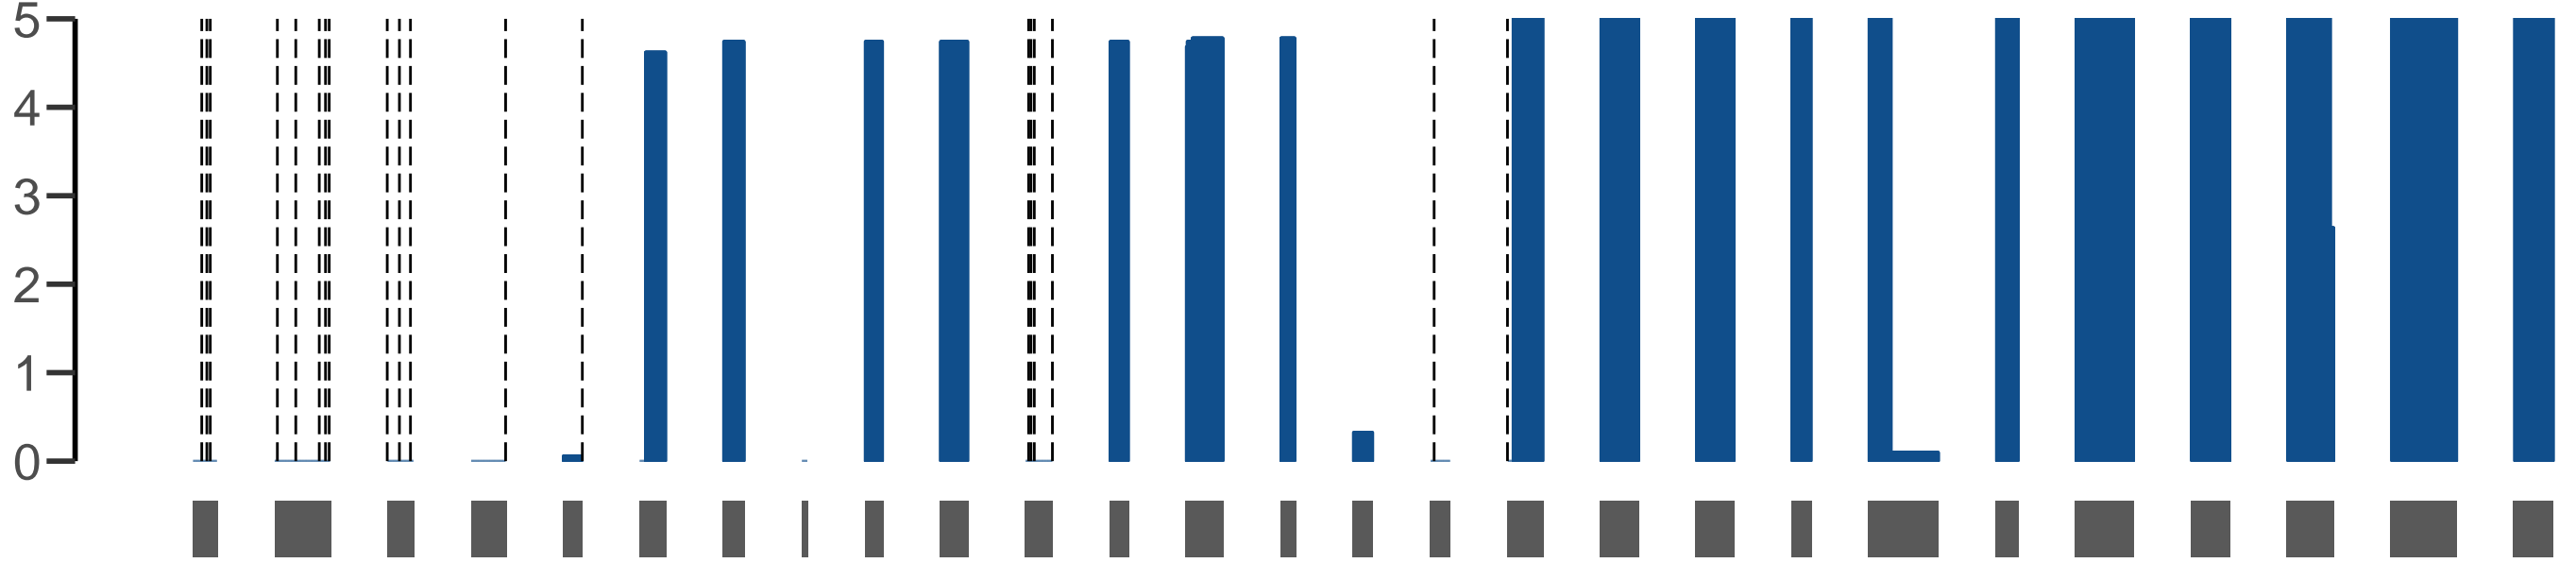

TCF4

# Nerve Tibial

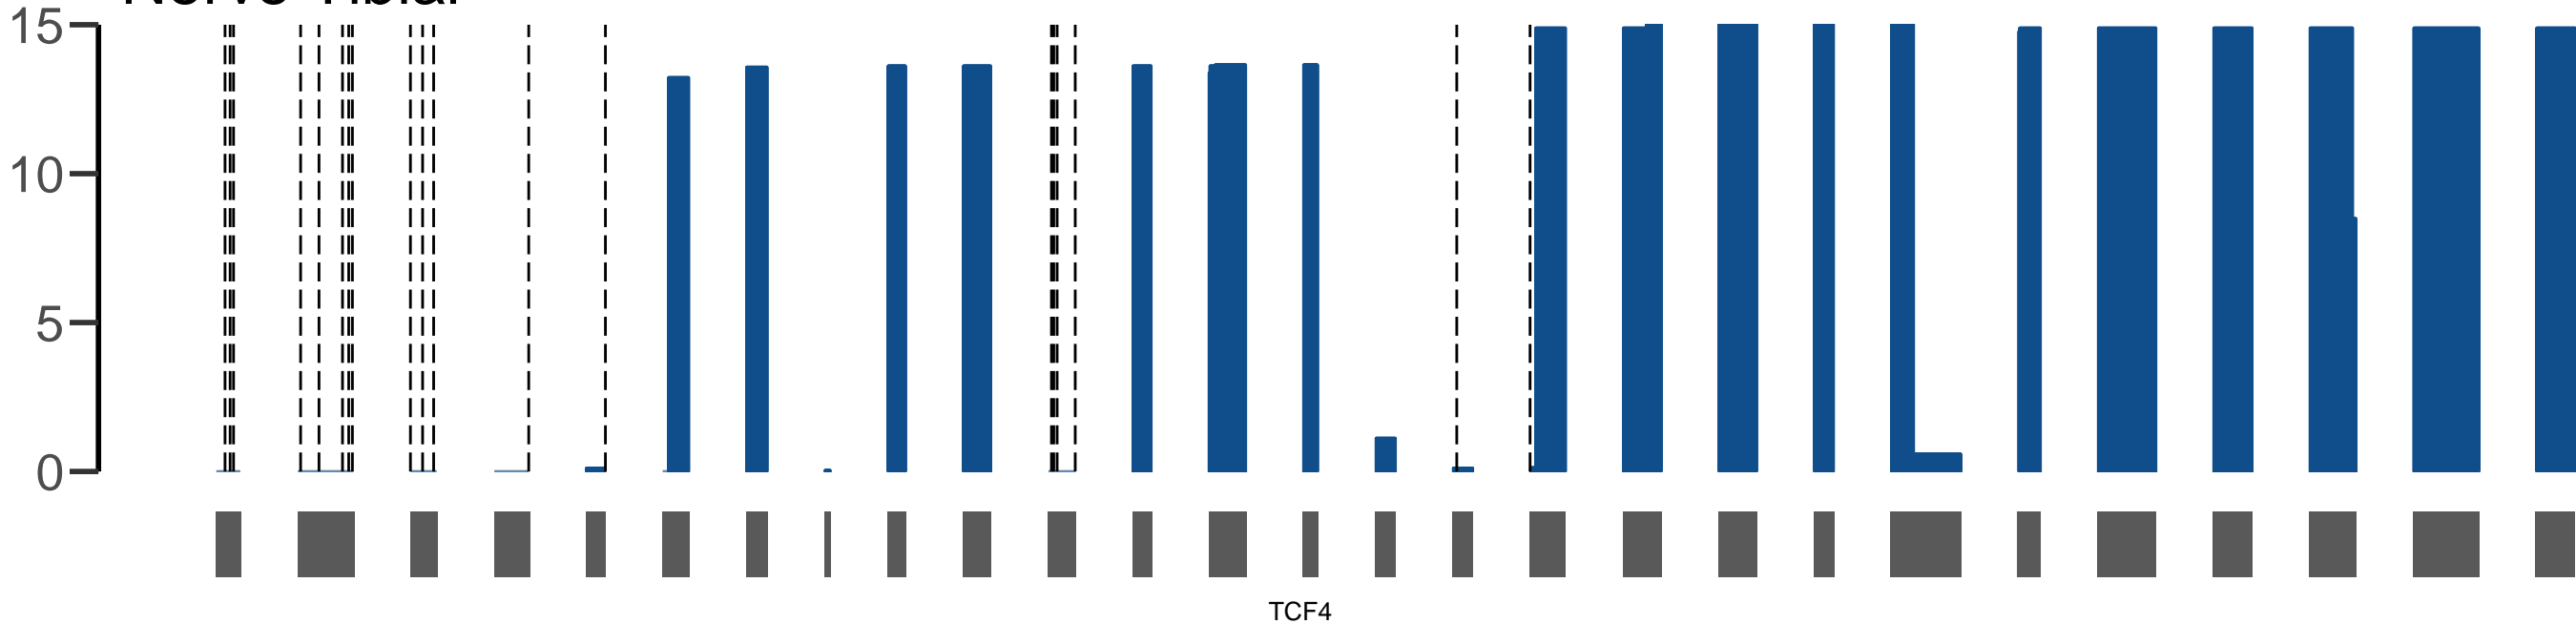

# Pancreas

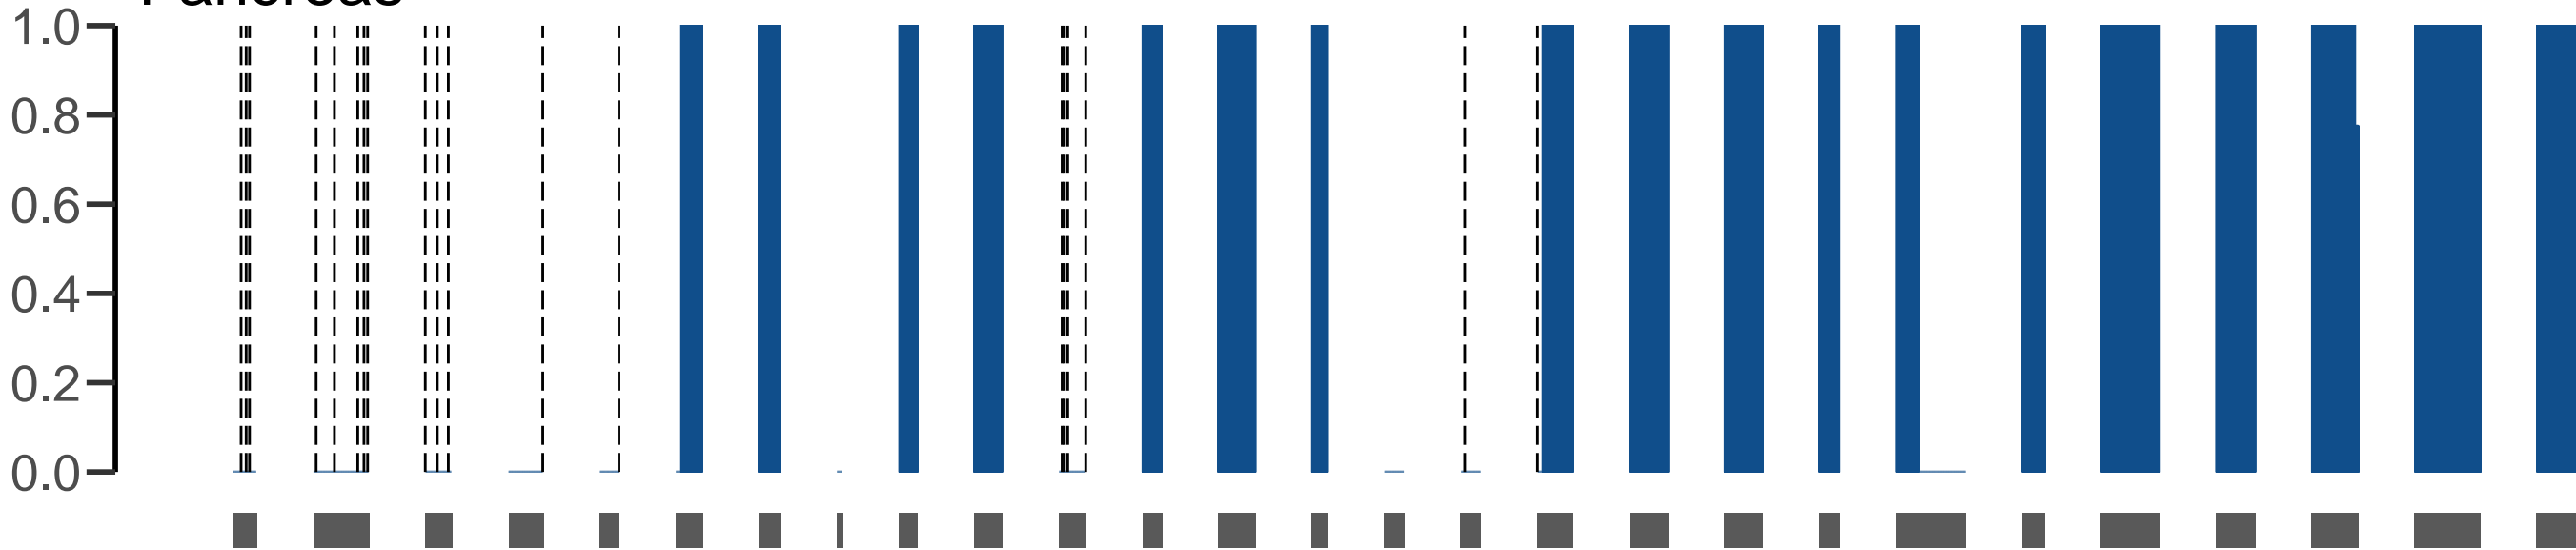

TCF4

Pituitary

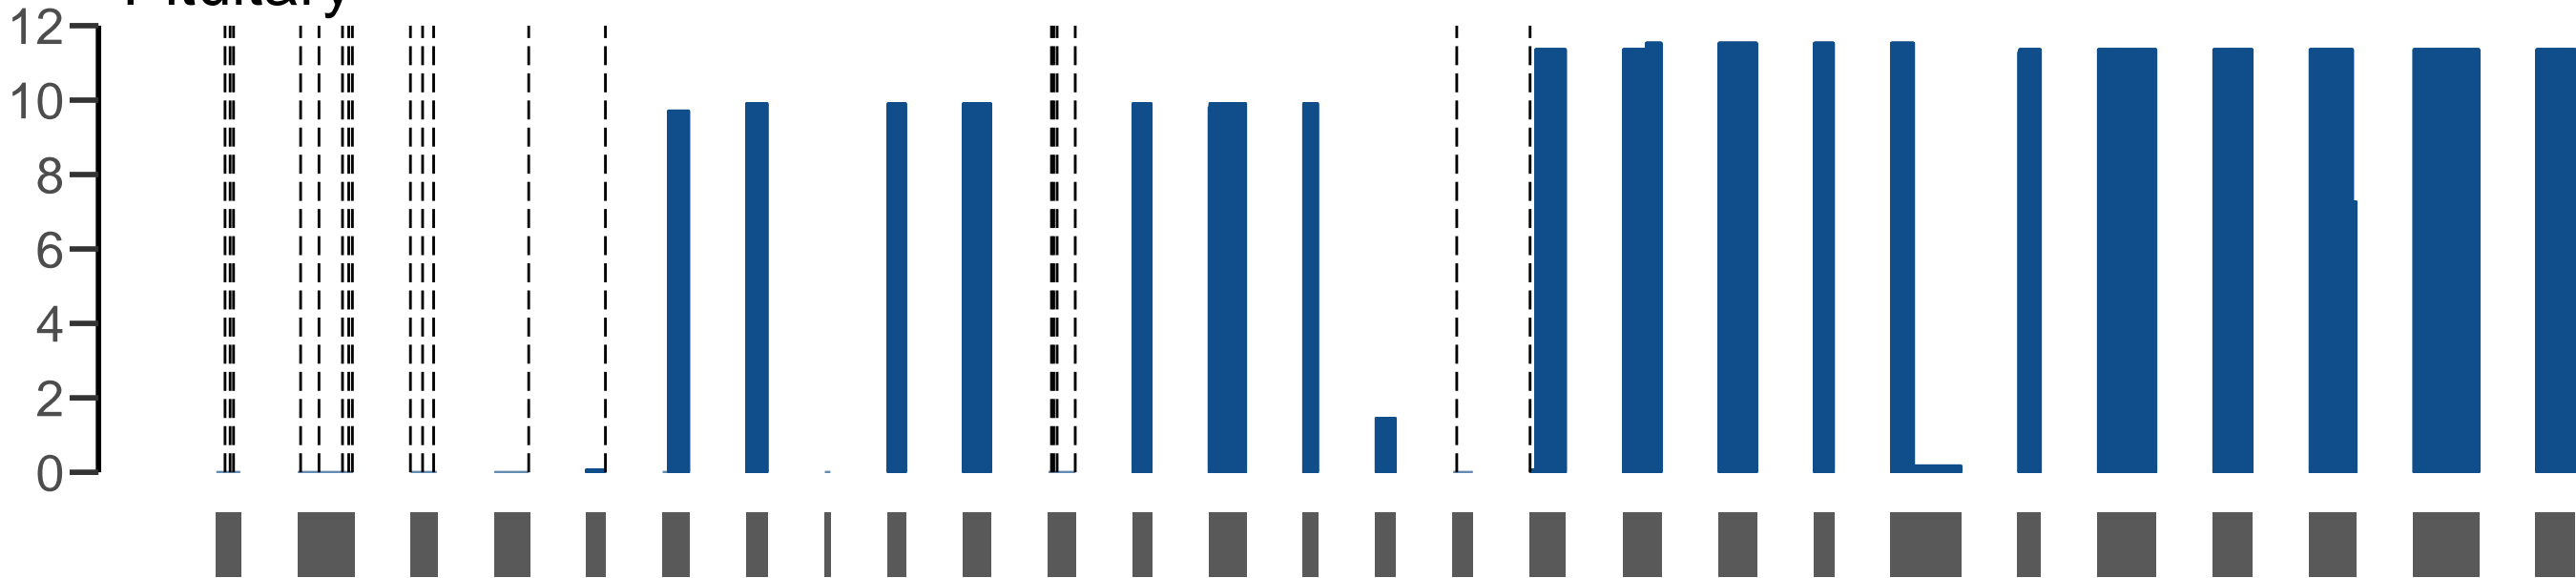

TCF4

# Skin NotSunExposed Suprapubic

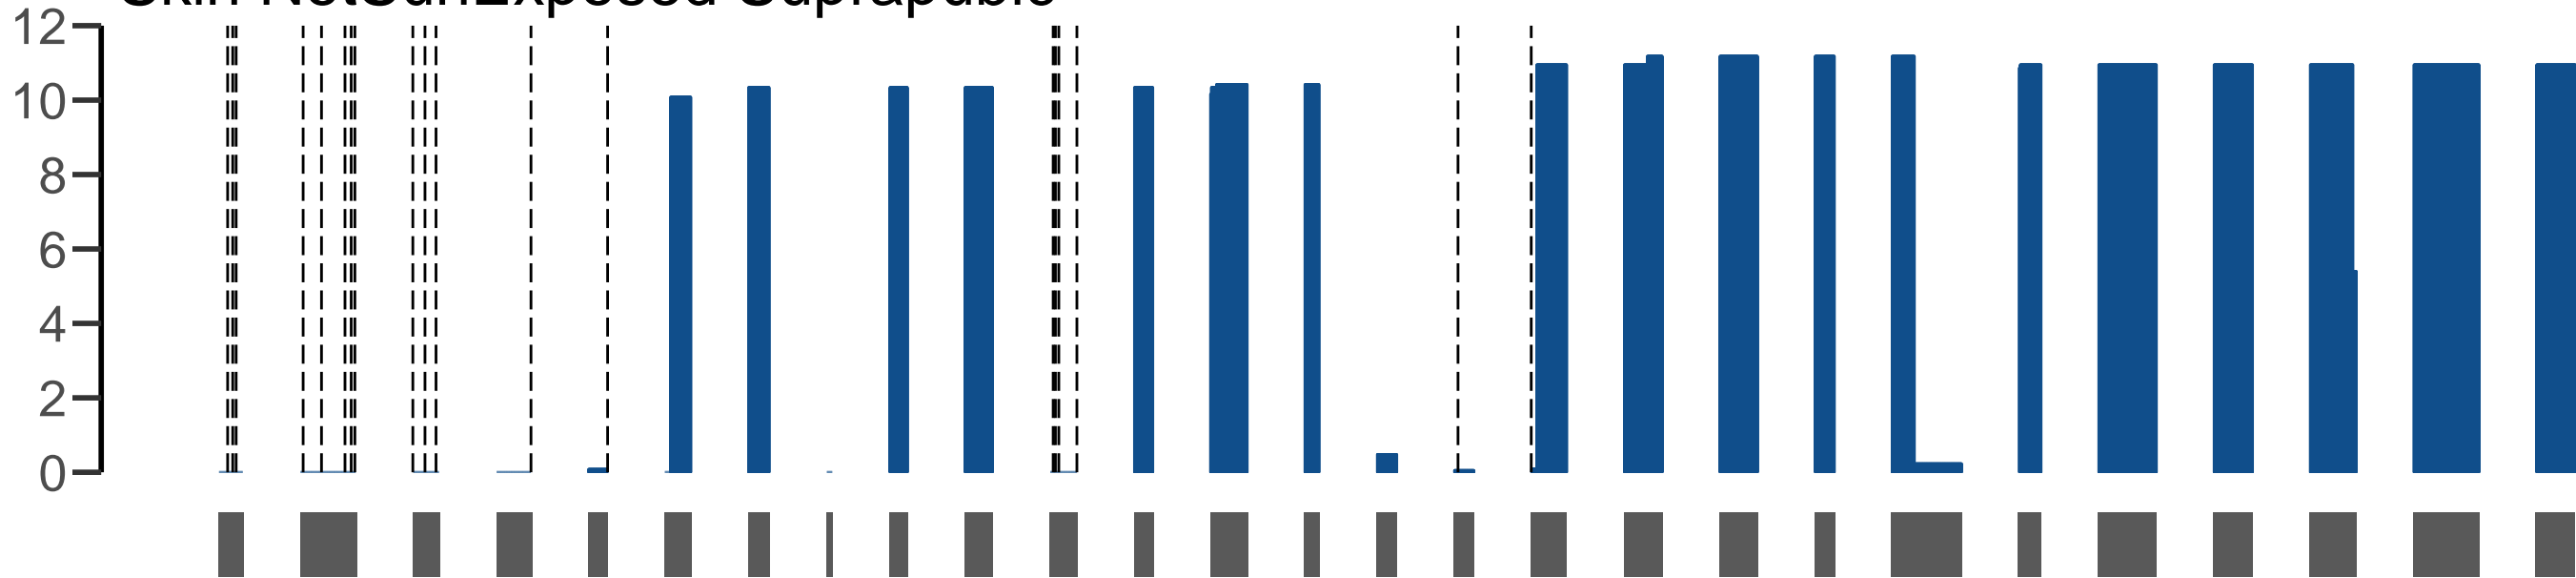

TCF4



# Skin SunExposed Lowerleg

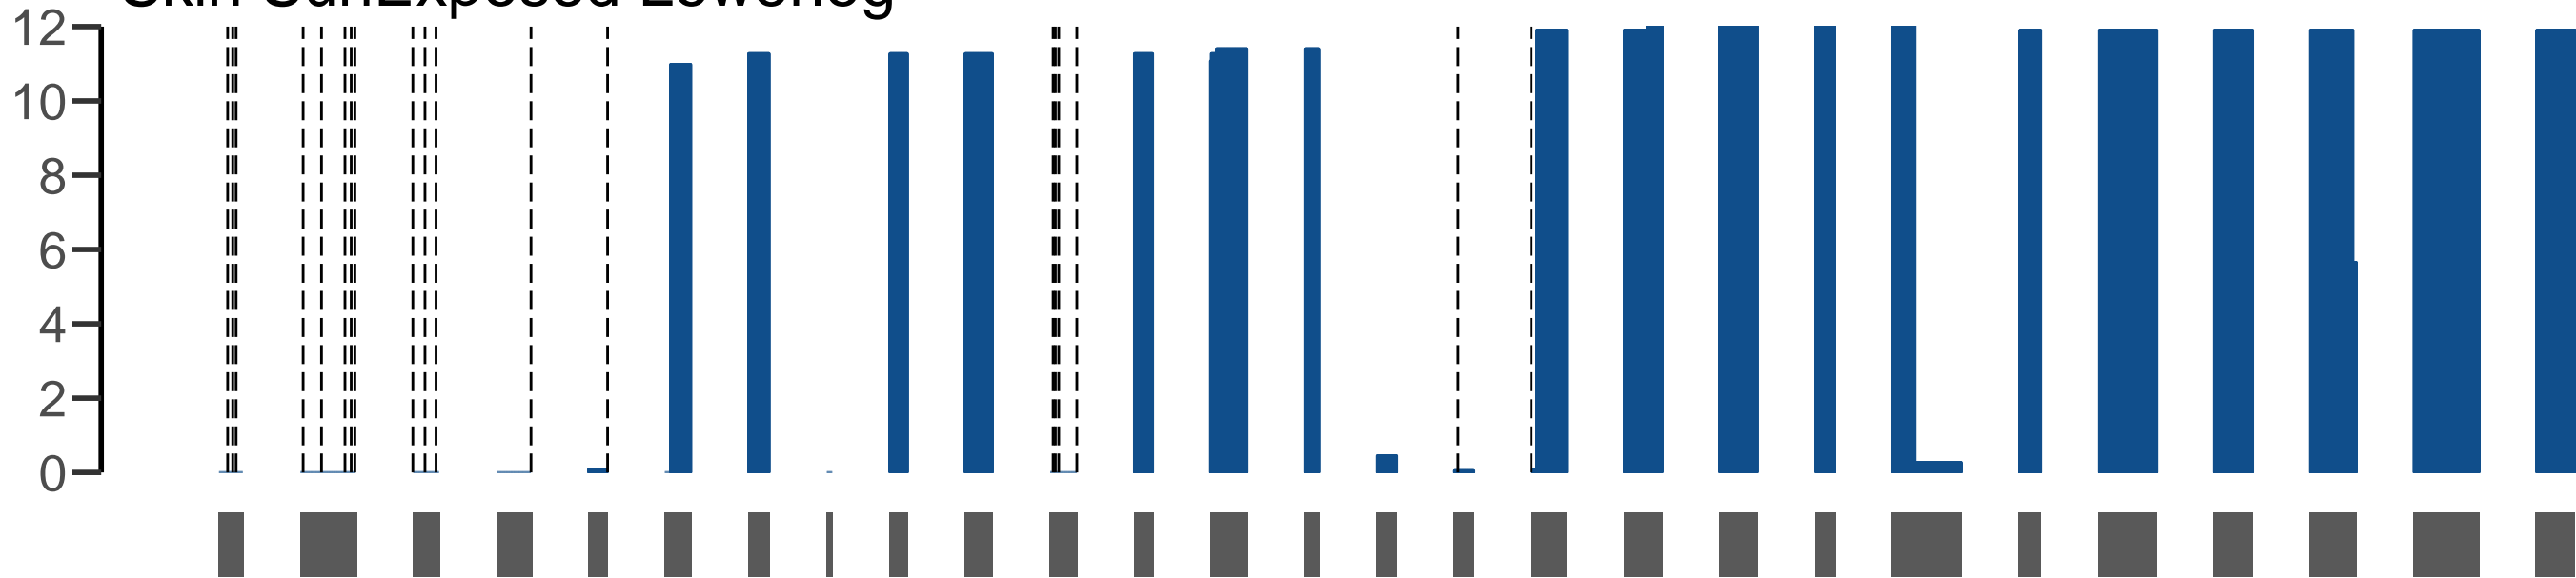

TCF4

# SmallIntestine TerminalIleum

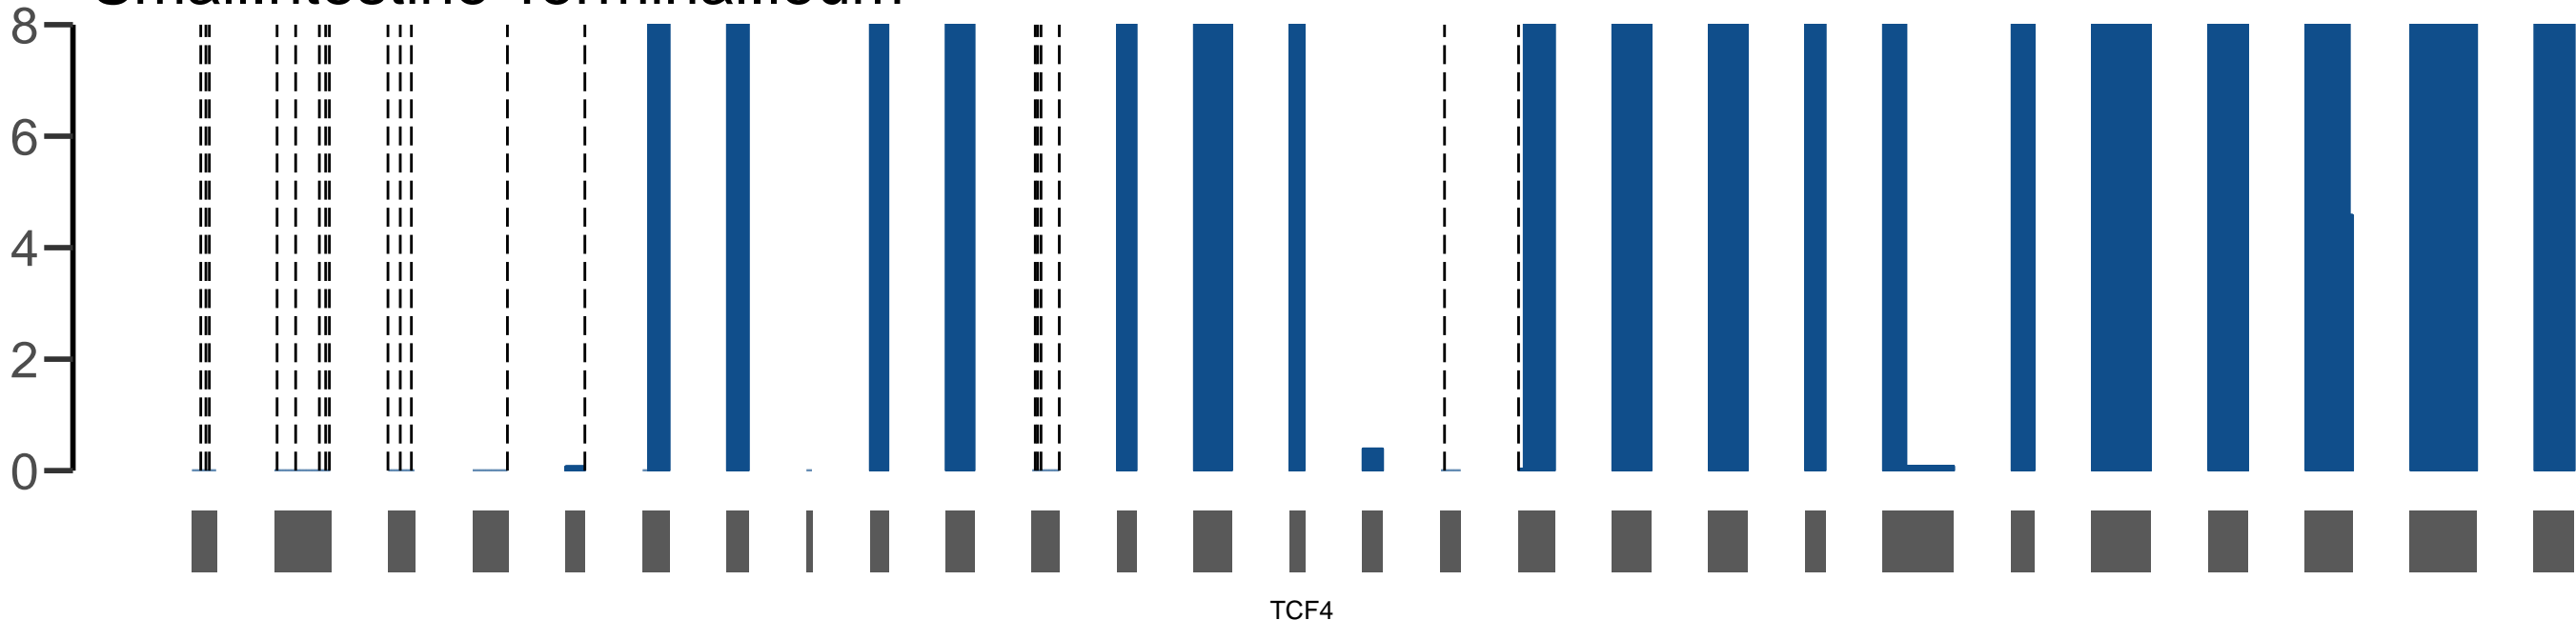

Spleen

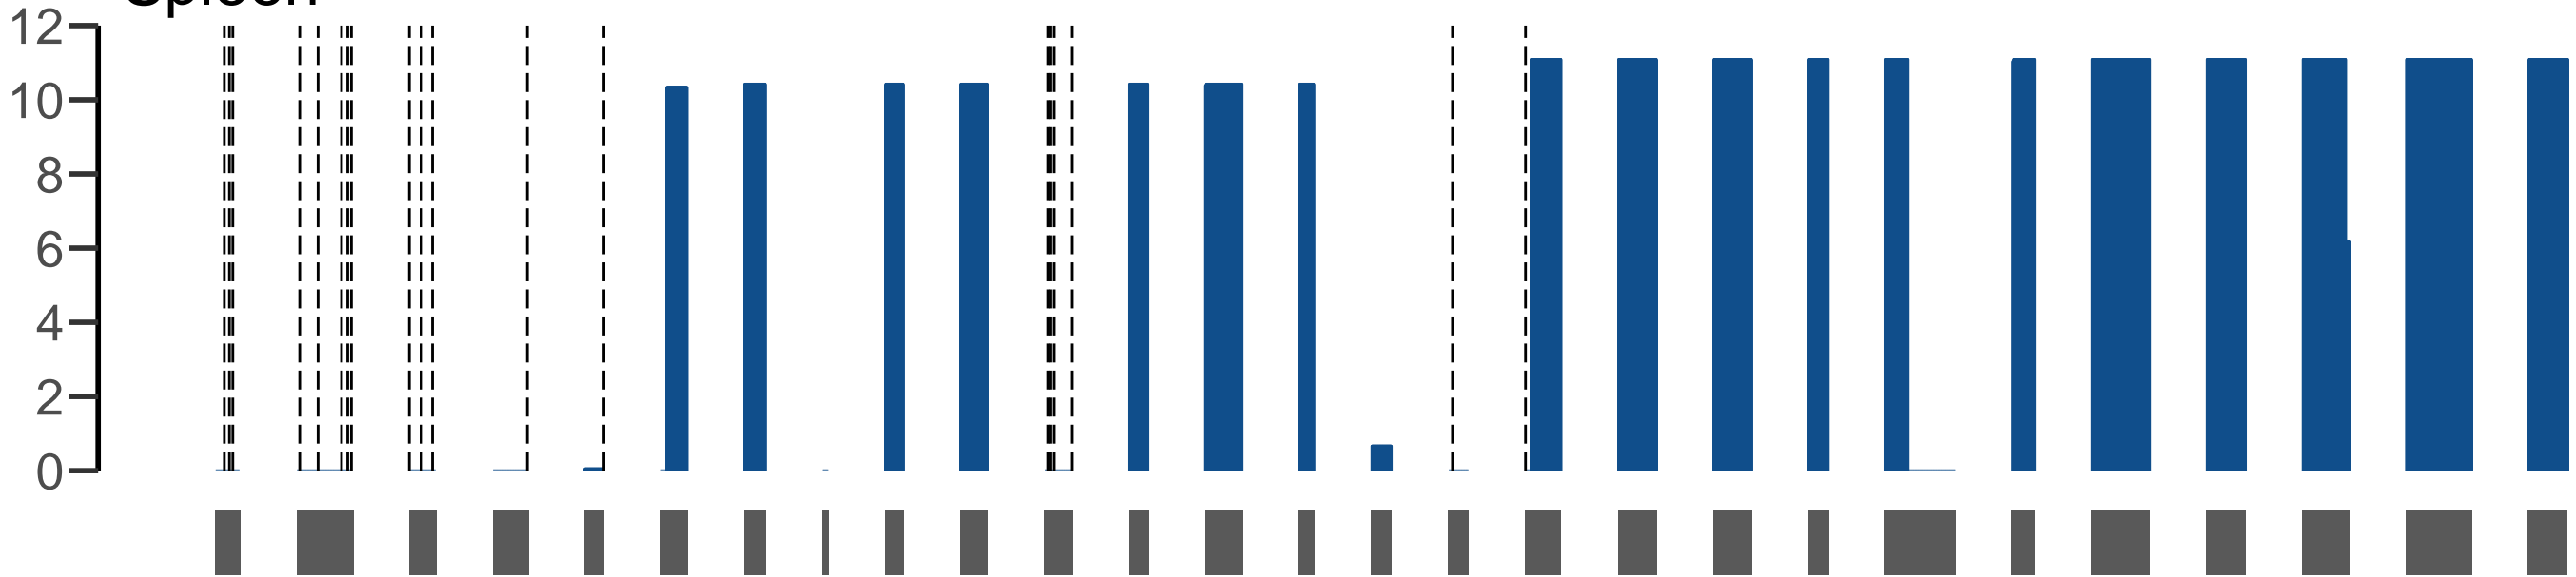

TCF4

# Stomach

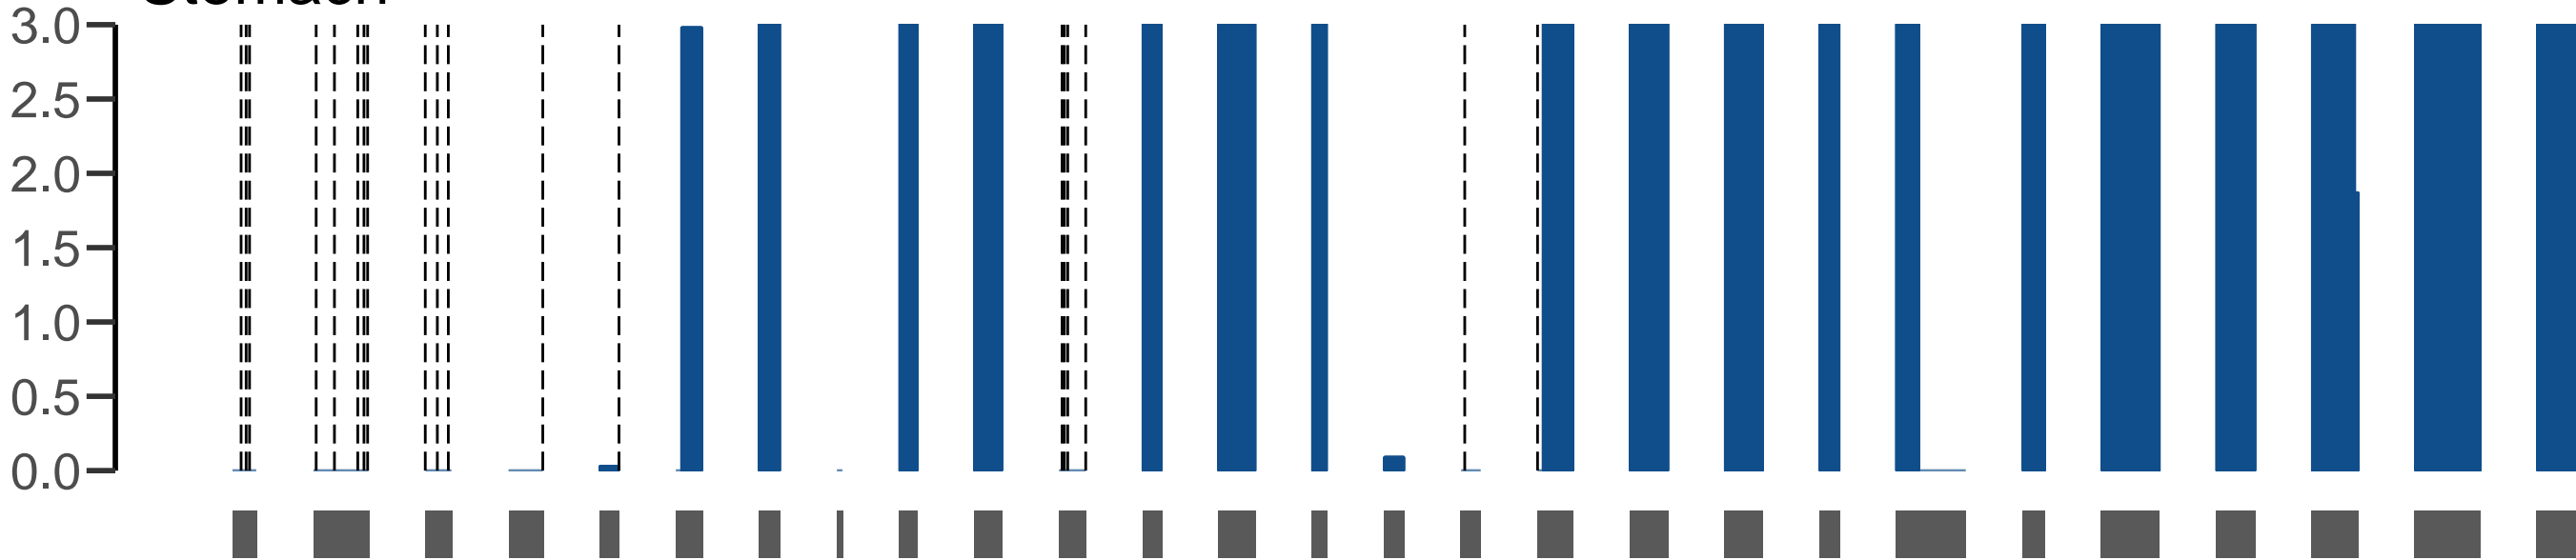

TCF4

# Thyroid

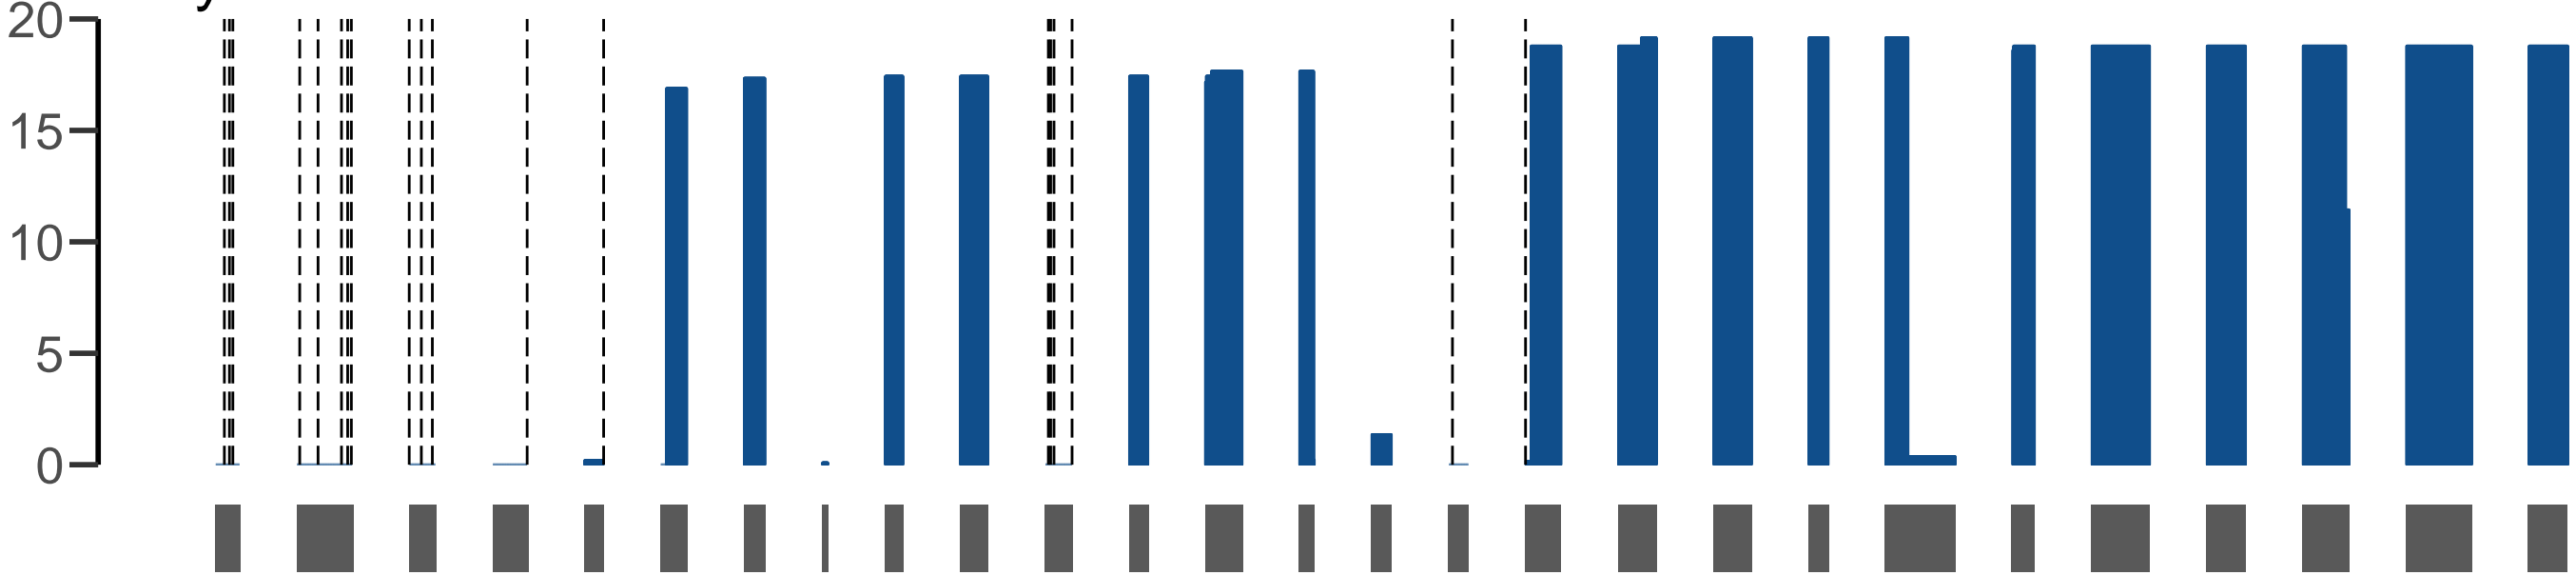

TCF4

# Whole Blood

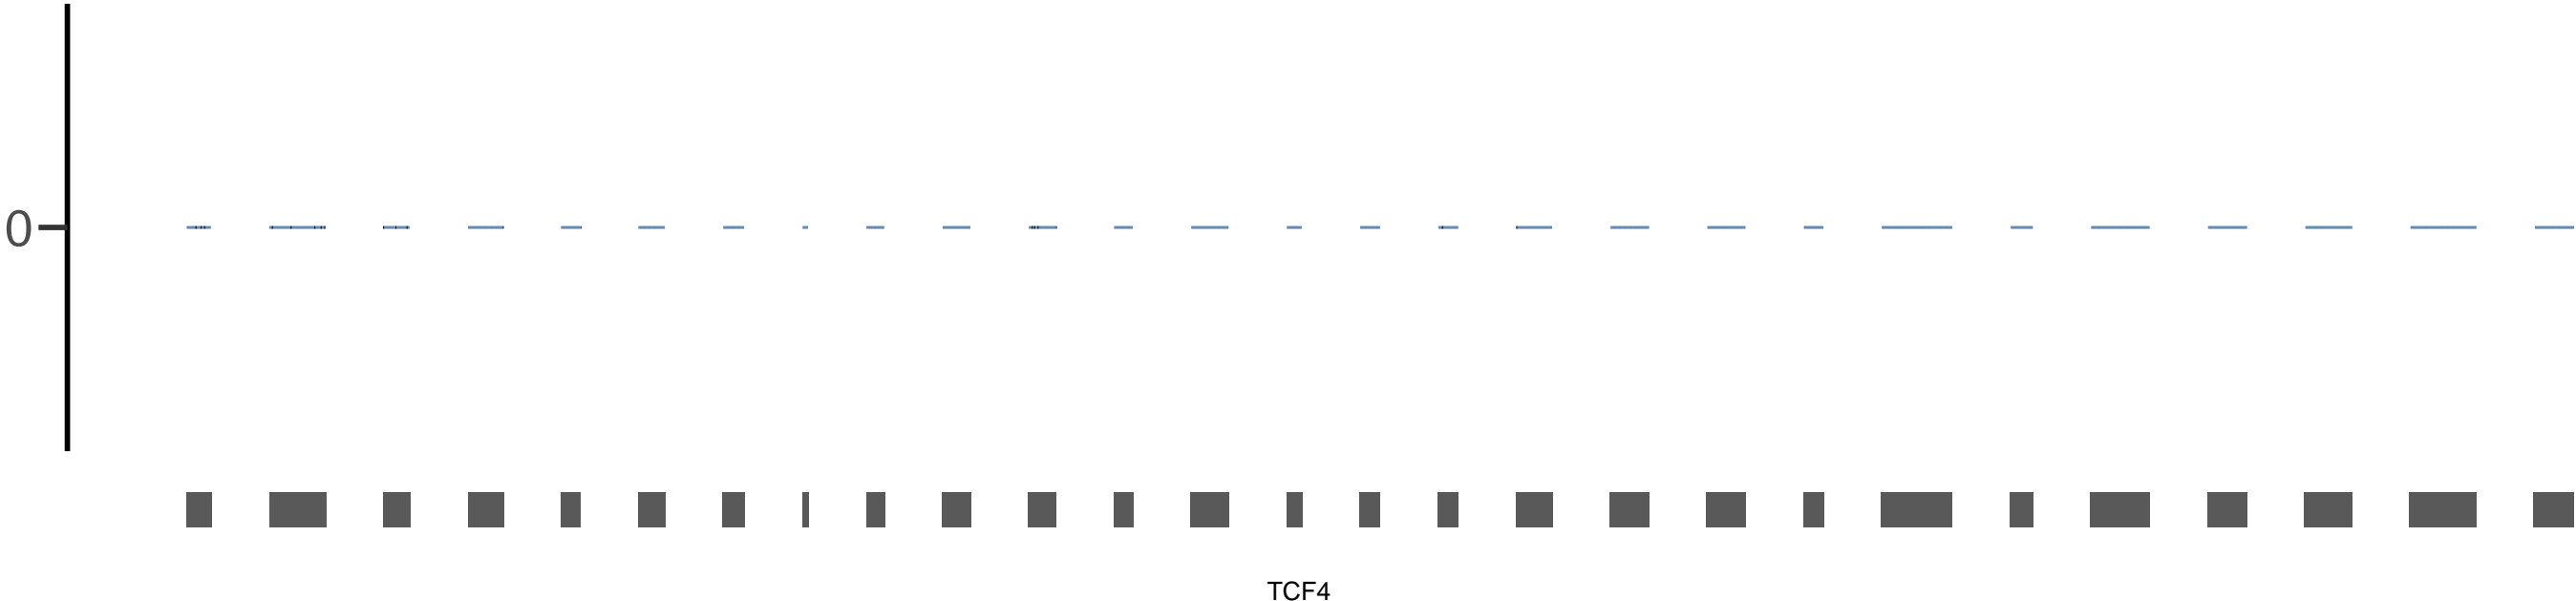

Supplement: Supplementary file [file media-1.pdf]
